# Supplementary material
Source: Royal Society of Chemistry journal article supplement (doi:10.1039/d6em00053c)
Supplement: d6em00053c1.xlsx [file d6em00053c1.xlsx]

## Sheet: Germination percentage
CHINA
	Soybean	Wheat	Mung bean	Sunflower	Lettuce	Rice	Chinese Cabbage	Chicory	Leucanthemum maximum
Chloramphenicol	56.6667	86.6667	83.3333	20	96.6667	86.6667	83.3333		26.6667
Oxytetracyine Hydrochloride	90	93.3333	86.6667	0	100	93.3333	86.6667		13.3333
Ofloxacin	50	90	86.6667	10	96.6667	86.6667	90		26.6667
Trimethoprim	36.6667	93.3333	86.6667	10	90	90	86.6667		40
Azithromycin	40	96.6667	86.6667	10	90	83.3333	83.3333		16.6667
Sulfadimidine	73.3333	93.3333	93.3333	13.3333	100	86.6667	93.3333		13.3333
Enrofloxacin	56.6667	90	80	13.3333	100	86.6667	93.3333		33.3333
Ciprofloxacin	53.3333	96.6667	83.3333	6.66667	93.3333	96.6667	76.6667		16.6667
Florfenicol	80	96.6667	90	6.66667	90	80	16.6667		23.3333
Lincomycin	73.3333	96.6667	86.6667	10	96.6667	90	73.3333		23.3333
Control	66.6667	100	100	33.3333	86.6667	90	86.6667		16.6667
		94.6667
		3.22031
Chloramphenicol	-10	-13.3333	-16.6667	-13.3333	10	-3.33333	-3.33333		10
Oxytetracyine Hydrochloride	23.3333	-6.66667	-13.3333	-33.3333	13.3333	3.33333	0		-3.33333
Ofloxacin	-16.6667	-10	-13.3333	-23.3333	10	-3.33333	3.33333		10
Trimethoprim	-30	-6.66667	-13.3333	-23.3333	3.33333	0	0		23.3333
Azithromycin	-26.6667	-3.33333	-13.3333	-23.3333	3.33333	-6.66667	-3.33333		0
Sulfadimidine	6.66667	-6.66667	-6.66667	-20	13.3333	-3.33333	6.66667		-3.33333
Enrofloxacin	-10	-10	-20	-20	13.3333	-3.33333	6.66667		16.6667
Ciprofloxacin	-13.3333	-3.33333	-16.6667	-26.6667	6.66667	6.66667	-10		0
Florfenicol	13.3333	-3.33333	-10	-26.6667	3.33333	-10	-70		6.66667
Lincomycin	6.66667	-3.33333	-13.3333	-23.3333	10	0	-13.3333		6.66667
Average	15.6667	6.66667	13.6667	23.3333	8.66667	4	11.6667	0	8
SD	8.32221	3.51364	3.66835	5.21157	4.21637	3.06312	20.9202	0	7.4037
MAX	23.9889	10.1803	17.335	28.5449	12.883	7.06312	32.5869	0	15.4037
Ciprofloxacin				-10
Oxtetracycline hydrochloride				7
Oflaxacin				0
Trimethoprim				-7
Azithromycin				7
Sulfamethazine				7
Enrofloxacin				-10
Florfenicol				-3
Chloramphenicol				-7
Lincomycin				-3

## Sheet: SOY
													Germination %																	Germinadas	No germinadas
Category of antibiotics	Chloramphenicol	Oxytetracycline Hydrochloride	Ofloxacin	Trimethoprim	Azithromycin	Sulfadimidine	Enrofloxacin	Ciprofloxacin	Florfenicol	Lincomycin	Control Group		Chloramphenicol	Oxytetracycline Hydrochloride	Ofloxacin	Trimethoprim	Azithromycin	Sulfadimidine	Enrofloxacin	Ciprofloxacin	Florfenicol	Lincomycin	Control Group						Chloramphenicol	17	13
Pre-test mass/mg	6683.4	6569.8	7621.9	6792.5	6555.8	6482.2	6403.8	6077.8	7051.5	6807.4	6367.8		56.6667	90	50	36.6667	40	73.3333	56.6667	53.3333	80	73.3333	66.6667						Oxytetracycline Hydrochloride	27	3
Number of germinations/30	17	27	15	11	12	22	17	16	24	22	20																		Ofloxacin	15	15
Germination fresh weight/mg	20850.4	26673.2	19696	13585.2	10603.8	29005.8	19897.3	18015.3	23953.8	23669.3	26321.6																		Trimethoprim	11	19
Total fresh weight/mg		26119.2																											Azithromycin	12	18
Germination dry weight/mg	3221.5	6306.7	3594.7	2274.5	1857.8	4001.7	3338.6	2549.7	3973.1	4174	3542.8																		Sulfadimidine	22	8
Total dry weight/mg		6491.1															CHL =	Chloramphenicol											Enrofloxacin	17	13
Mean root lenght (cm)	16.3268	11.5759	15.2193	17.5829	11.4102	20.4995	14.4245	16.0337	16.6602	16.0324	14.7919																		Ciprofloxacin	16	14
Δm (mf- mi)	-3461.9	-263.1	-4027.2	-4518	-4698	-2480.5	-3065.2	-3528.1	-3078.4	-2633.4	-2825																		Florfenicol	24	6
RCI (%)	9.0691	-78.0146	-1.46494	35.7994	47.5613	-12.953	5.7638	28.0315	-12.1458	-17.8164	0																		Lincomycin	22	8
	Root lenght (cm)																Root lenght (mm)												Control Group	20	10
	Chloramphenicol	Oxytetracycline	Ofloxacin	Trimethoprim	Azithromycin	Sulfadimidine	Enrofloxacin	Ciprofloxacin	Florfenicol	Lincomycin	Control Group		Treatment	% germination			Chloramphenicol	Oxytetracycline	Ofloxacin	Trimethoprim	Azithromycin	Sulfadimidine	Enrofloxacin	Ciprofloxacin	Florfenicol	Lincomycin	Control Group
	17.605	3.223	26.056	22.875	10.978	17.704	25.439	17.978	20.764	25.456	3.904		Chloramphenicol	56.6667		1	176.05	32.23	260.56	228.75	109.78	177.04	254.39	179.78	207.64	254.56	39.04
	18.454	19.292	22.64	24.077	22.922	21.557	16.898	22.637	19.072	20.601	2.276		Oxytetracycline	90		2	184.54	192.92	226.4	240.77	229.22	215.57	168.98	226.37	190.72	206.01	22.76
	3.255	12.517	22.826	5.875	7.683	7.089	8.941	24.74	25.204	11.551	2.923		Ofloxacin	50		3	32.55	125.17	228.26	58.75	76.83	70.89	89.41	247.4	252.04	115.51	29.23
	15.751	28.335	12.709	14.77	19.385	17.225	9.633	8.249	24.901	25.482	5.948		Trimethoprim	36.6667		4	157.51	283.35	127.09	147.7	193.85	172.25	96.33	82.49	249.01	254.82	59.48
	12.916	20.374	15.656	11.805	12.385	21.554	3.358	22.722	20.753	17.445	3.237		Azithromycin	40		5	129.16	203.74	156.56	118.05	123.85	215.54	33.58	227.22	207.53	174.45	32.37
	14.861	8.023	12.403	18.142	17.836	26.96	13.83	14.267	4.364	19.193	29.665		Sulfadimidine	73.3333		6	148.61	80.23	124.03	181.42	178.36	269.6	138.3	142.67	43.64	191.93	296.65
	16.434	11.232	15.051	21.08	4.369	26.218	8.344	8.312	16	29.619	28.2		Enrofloxacin	56.6667		7	164.34	112.32	150.51	210.8	43.69	262.18	83.44	83.12	160	296.19	282
	18.947	16.051	13.742	10.41	11.736	16.352	13.691	22.652	5.168	5.09	18.081		Ciprofloxacin	53.3333		8	189.47	160.51	137.42	104.1	117.36	163.52	136.91	226.52	51.68	50.9	180.81
	18.251	1.501	18.362	24.735	4.277	22.599	5.659	10.124	17.679	29.649	14.252		Florfenicol	80		9	182.51	15.01	183.62	247.35	42.77	225.99	56.59	101.24	176.79	296.49	142.52
	21.355	1.672	20.063	23.439	7.702	22.767	19.266	14.813	8.609	29.547	15.375		Lincomycin	73.3333		10	213.55	16.72	200.63	234.39	77.02	227.67	192.66	148.13	86.09	295.47	153.75
	3.226	2.086	10.17	16.204	8.732	24.401	20.606	25.51	17.872	13.635	12.008		Control	66.6667		11	32.26	20.86	101.7	162.04	87.32	244.01	206.06	255.1	178.72	136.35	120.08
	22.916	3.508	23.19		8.917	25.744	6.968	19.899	11.636	3.604	16.553					12	229.16	35.08	231.9		89.17	257.44	69.68	198.99	116.36	36.04	165.53
	18.124	1.557	7.49			12.066	18.562	18.677	16.244	7.331	16.098					13	181.24	15.57	74.9			120.66	185.62	186.77	162.44	73.31	160.98
	11.618	17.639	22.43			21.893	21.944	14.615	17.129	6.854	18.187					14	116.18	176.39	224.3			218.93	219.44	146.15	171.29	68.54	181.87
	18.741	6.921	22.505			24.911	22.371	6.243	3.578	25.778	17.188					15	187.41	69.21	225.05			249.11	223.71	62.43	35.78	257.78	171.88
	23.953	6.438	3.085			18.799	25.136	5.102	15.212	24.613	13.662					16	239.53	64.38	30.85			187.99	251.36	51.02	152.12	246.13	136.62
	21.148	19.521	1.553			21.633	4.571		20.308	17.824	13.365					17	211.48	195.21	15.53			216.33	45.71		203.08	178.24	133.65
		21.784	4.017			15.91			31.839	5.618	16.276					18		217.84	40.17			159.1			318.39	56.18	162.76
		23.397				22.061			19.465	2.47	22.951					19		233.97				220.61			194.65	24.7	229.51
		18.955				23.316			26.565	13.988	25.69					20		189.55				233.16			265.65	139.88	256.9
		18.374				17.302			1.609	7.579						21		183.74				173.02			16.09	75.79
		16.549				22.928			25.492	9.786						22		165.49				229.28			254.92	97.86
		16.967							15.49							23		169.67							154.9
		11.953							14.891							24		119.53							148.91
		1.758														25		17.58
		2.173														26		21.73
		0.749														27		7.49
																28
																29
																30
Average	16.3268	11.5759	15.2193	17.5829	11.4102	20.4995	14.4245	16.0337	16.6602	16.0324	14.7919					Average	163.268	115.759	152.193	175.829	114.102	204.995	144.245	160.337	166.602	160.324	147.919
Standard devation	5.88796	8.37781	7.64538	6.3237	5.87866	4.82447	7.431	6.83414	7.77101	9.26454	8.1464					Median	181.875	122.35	150.51	171.73	89.17	218.93	137.605	148.13	171.29	139.88	160.98
																MIN	32.26	7.49	15.53	58.75	42.77	70.89	33.58	51.02	16.09	24.7	22.76
																MAX	239.53	283.35	231.9	247.35	229.22	269.6	251.36	255.1	318.39	296.49	296.65
																Q1 (25 %)	134.023	21.5125	88.3	114.562	76.83	172.635	73.12	83.12	116.36	70.925	120.08
																Q3 (75 %)	205.977	190.392	224.675	235.985	178.36	238.585	202.71	226.52	207.53	250.475	181.87
																IQR	71.955	168.88	136.375	121.422	101.53	65.95	129.59	143.4	91.17	179.55	61.79

## Sheet: WT
													Germination %
Category of antibiotics	Chloramphenicol	Oxytetracycline Hydrochloride	Ofloxacin	Trimethoprim	Azithromycin	Sulfadimidine	Enrofloxacin	Ciprofloxacin	Florfenicol	Lincomycin	Control Group		Chloramphenicol	Oxytetracycline Hydrochloride	Ofloxacin	Trimethoprim	Azithromycin	Sulfadimidine	Enrofloxacin	Ciprofloxacin	Florfenicol	Lincomycin	Control Group
Pre-test mass/mg	1349.5	1380.8	1385.1	1412.5	1323.6	1375.6	1440.2	1544.8	1429.4	1452.1	1354.3		86.6667	93.3333	90	93.3333	96.6667	93.3333	90	96.6667	96.6667	96.6667	100
Number of germinations/30	26	28	27	28	29	28	27	29	29	29	30		86.6667	93.3333	90	93.3333	96.6667	93.3333	90	96.6667	96.6667	96.6667	100
Germination fresh weight/mg	4858.8	4899.2	4604.1	5999.5	5794	5786.2	5604.1	7084.1	6785.2	5007.9
Total fresh weight/mg	5217.2	5038.7	4846.4	6146.6	5887.4	5884.5	5837.7	7144	6806.5	5109.4	5951.9
Germination dry weight/mg	1662.9	1497.6	1301.9	2042.7	1826.1	1572.3	1535.2	2050.1	1637.7	1889.6
Total dry weight/mg	1895.2	1567.2	1460.8	2134	1859.6	1628.4	1714.1	2086.7	1669.9	1948.8	1686.8						CHL =	Chloramphenicol
Mean root lenght (cm)	10.809	15.0935	17.8995	13.1422	10.24	16.2461	16.3915	16.9238	12.8001	14.4913	15.5099
Δm (mf- mi)	545.7	186.4	75.7	721.5	536	252.8	273.9	541.9	240.5	496.7	332.5																		Florfenicol	29	1
RCI (%)	-12.3548	7.09035	13.3982	-26.5117	-10.2442	3.46218	-1.61845	-23.7076	1.0019	-15.5324	0																		Lincomycin	29	1
	Root lenght (cm)																Root lenght (mm)
	Chloramphenicol	Oxytetracycline	Ofloxacin	Trimethoprim	Azithromycin	Sulfadimidine	Enrofloxacin	Ciprofloxacin	Florfenicol	Lincomycin	Control Group		Treatment	% germination			Chloramphenicol	Oxytetracycline	Ofloxacin	Trimethoprim	Azithromycin	Sulfadimidine	Enrofloxacin	Ciprofloxacin	Florfenicol	Lincomycin	Control Group
	11.629	14.508	19.487	21.236	10.543	14.53	6.618	16.831	13.889	19.976	14.881		Chloramphenicol	86.6667		1	116.29	145.08	194.87	212.36	105.43	145.3	66.18	168.31	138.89	199.76	148.81
	15.533	15.431	17.629	3.506	12.952	15.793	8.214	11.536	13.014	8.408	19.861		Oxytetracycline	93.3333		2	155.33	154.31	176.29	35.06	129.52	157.93	82.14	115.36	130.14	84.08	198.61
	15.155	17.617	21.247	19.8	9.996	13.006	2.48	21.636	16.456	19.301	14.698		Ofloxacin	90		3	151.55	176.17	212.47	198	99.96	130.06	24.8	216.36	164.56	193.01	146.98
	17.152	19.51	21.889	20.18	9.835	18.578	14.862	21.094	19.476	14.799	10.944		Trimethoprim	93.3333		4	171.52	195.1	218.89	201.8	98.35	185.78	148.62	210.94	194.76	147.99	109.44
	5.983	19.223	20.942	5.736	7.786	18.983	18.523	18.477	17.042	15.147	18.967		Azithromycin	96.6667		5	59.83	192.23	209.42	57.36	77.86	189.83	185.23	184.77	170.42	151.47	189.67
	5.765	18.747	17.262	21.882	7.569	16.863	16.921	15.179	15.126	1.42	19.549		Sulfadimidine	93.3333		6	57.65	187.47	172.62	218.82	75.69	168.63	169.21	151.79	151.26	14.2	195.49
	11.67	14.187	16.29	1.661	13.051	14.949	17.611	21.421	14.905	11.028	14.81		Enrofloxacin	90		7	116.7	141.87	162.9	16.61	130.51	149.49	176.11	214.21	149.05	110.28	148.1
	2.038	18.178	20.401	1.439	13.938	19.17	18.01	20.211	17.726	4.059	13.592		Ciprofloxacin	96.6667		8	20.38	181.78	204.01	14.39	139.38	191.7	180.1	202.11	177.26	40.59	135.92
	1.743	2.712	21.33	17.484	2.489	23.433	18.239	16.897	17.582	17.316	15.037		Florfenicol	96.6667		9	17.43	27.12	213.3	174.84	24.89	234.33	182.39	168.97	175.82	173.16	150.37
	12.743	15.47	13.204	16.803	13.842	11.321	17.5	20.175	18.115	19.352	15.832		Lincomycin	96.6667		10	127.43	154.7	132.04	168.03	138.42	113.21	175	201.75	181.15	193.52	158.32
	12.836	14.613	18.928	13.002	13.688	19.376	20.444	16.457	11.241	17.729	12.724		Control	100		11	128.36	146.13	189.28	130.02	136.88	193.76	204.44	164.57	112.41	177.29	127.24
	18.128	18.949	7.951	6.542	8.094	18.149	15.562	19.149	8.148	15.898	8.113					12	181.28	189.49	79.51	65.42	80.94	181.49	155.62	191.49	81.48	158.98	81.13
	2.309	15.684	16.615	12.888	13.837	18.498	18.769	20.068	6.072	23.847	19.76					13	23.09	156.84	166.15	128.88	138.37	184.98	187.69	200.68	60.72	238.47	197.6
	12.757	18.905	13.955	18.869	14.824	22.107	12.838	17.584	15.344	15.986	18.702					14	127.57	189.05	139.55	188.69	148.24	221.07	128.38	175.84	153.44	159.86	187.02
	6.742	1.373	19.442	17.429	14.221	18.774	7.644	18.502	22.682	7.183	19.798					15	67.42	13.73	194.42	174.29	142.21	187.74	76.44	185.02	226.82	71.83	197.98
	7.015	19.139	14.338	15.983	4.433	21.288	21.453	19.621	9.096	18.588	15.811					16	70.15	191.39	143.38	159.83	44.33	212.88	214.53	196.21	90.96	185.88	158.11
	15.733	19.013	18.56	17.228	9.95	18.182	20.811	22.843	5.857	12.239	18.587					17	157.33	190.13	185.6	172.28	99.5	181.82	208.11	228.43	58.57	122.39	185.87
	14.376	11.772	21.337	20.508	12.618	15.806	21.425	23.645	12.756	24.244	14.453					18	143.76	117.72	213.37	205.08	126.18	158.06	214.25	236.45	127.56	242.44	144.53
	14.36	19.105	20.157	10.979	6.689	8.374	2.894	19.014	1.472	19.318	10.957					19	143.6	191.05	201.57	109.79	66.89	83.74	28.94	190.14	14.72	193.18	109.57
	18.098	21.786	15.554	3.806	14.752	16.788	15.946	21.256	14.125	18.475	22.528					20	180.98	217.86	155.54	38.06	147.52	167.88	159.46	212.56	141.25	184.75	225.28
	11.16	13.444	20.373	2.193	8.02	16.34	20.517	17.274	16.906	11.452	13.518					21	111.6	134.44	203.73	21.93	80.2	163.4	205.17	172.74	169.06	114.52	135.18
	13.797	11.143	18.039	17.241	12.031	8.037	19.225	17.665	7.576	14.042	1.361					22	137.97	111.43	180.39	172.41	120.31	80.37	192.25	176.65	75.76	140.42	13.61
	12.986	10.985	14.644	12.687	9.323	18.802	24.592	20.324	9.928	19.893	18.78					23	129.86	109.85	146.44	126.87	93.23	188.02	245.92	203.24	99.28	198.93	187.8
	15.543	19.053	24.976	16.475	12.635	16.331	20.276	14.844	16.037	17.543	11.307					24	155.43	190.53	249.76	164.75	126.35	163.31	202.76	148.44	160.37	175.43	113.07
	4.88	7.431	25.016	13.19	7.263	22.537	23.018	19.949	13.003	17.877	11.371					25	48.8	74.31	250.16	131.9	72.63	225.37	230.18	199.49	130.03	178.77	113.71
	0.902	11.023	15.353	19.055	8.66	4.326	19.671	6.902	17.03	18.832	19.799					26	9.02	110.23	153.53	190.55	86.6	43.26	196.71	69.02	170.3	188.32	197.99
		18.418	8.367	2.683	7.211	23.819	18.507	5.229	3.486	13.881	20.807					27		184.18	83.67	26.83	72.11	238.19	185.07	52.29	34.86	138.81	208.07
		15.198		17.496	8.014	0.73		3.999	11.29	1.315	10.705					28		151.98		174.96	80.14	7.3		39.99	112.9	13.15	107.05
					8.695			3.008	5.822	1.1	18.736					29					86.95			30.08	58.22	11	187.36
											19.31					30											193.1
Average	10.809	15.0935	17.8995	13.1422	10.24	16.2461	16.3915	16.9238	12.8001	14.4913	15.5099					Average	108.09	150.935	178.995	131.422	102.4	162.461	163.915	169.238	128.001	144.913	155.099
Standard devaition	5.40856	5.01704	4.16952	6.83534	3.25558	5.50304	5.89373	5.56748	5.16301	6.42918	4.57659					Median	127.57	156.84	182.995	159.83	98.925	181.49	183.73	187.58	135.695	159.42	158.11
																MIN	9.02	13.73	79.51	14.39	24.89	7.3	24.8	30.08	14.72	11	13.61
																MAX	181.28	217.86	250.16	218.82	148.24	238.19	245.92	236.45	226.82	242.44	225.28
																Q1 (25 %)	58.74	117.72	151.757	57.36	78.43	149.49	153.87	154.985	83.85	111.34	120.475
																Q3 (75 %)	153.44	190.13	210.183	174.96	135.287	191.7	204.623	202.958	169.99	187.71	194.295
																IQR	94.7	72.41	58.425	117.6	56.8575	42.21	50.7525	47.9725	86.14	76.37	73.82

## Sheet: MB
													Germination %
Category of antibiotics	Chloramphenicol	Oxytetracycline Hydrochloride	Ofloxacin	Trimethoprim	Azithromycin	Sulfadimidine	Enrofloxacin	Ciprofloxacin	Florfenicol	Lincomycin	Control Group		CHL	OTC	OFL	TMP	AZM	SDM	ENR	CIP	FLOR	LIN	C
Pre-test mass/mg	2380.4	2323.4	2430.1	2243.8	2455.7	2370.7	2200.6	2324.4	2298.5	2502.6	2437.6		83.3333	86.6667	86.6667	86.6667	86.6667	93.3333	80	83.3333	90	86.6667	100
Number of germinations/30	25	26	26	26	26	28	24	25	27	26	30		83.3333	86.6667	86.6667	86.6667	86.6667	93.3333	80	83.3333	90	86.6667	100
Germination fresh weight/mg	21435.1	13057.8	23018.2	19690.6	20561.9	22585.5	16549.9	17258.1	18888.3	19560.5
Total fresh weight/mg	23709.2	14183.7	24193.2	20840.7	21726.5	23451.5	18475.3	19550.2	20533.1	21533.7	27842.1
Germination dry weight/mg	2064.2	1472.5	1516.3	1534.7	1526.1	1750.2	1307.1	1672.1	1755.9	1799
Total dry weight/mg	2687.4	1663.1	1623	1763.9	1678.2	1969	1506.7	2020.4	1894.2	2371.8	1689.7
Mean root lenght (cm)	16.2991	15.515	20.0589	20.5848	21.9381	19.1636	17.004	20.81	15.866	20.1408	17.2442
Δm (mf- mi)	307	-660.3	-807.1	-479.9	-777.5	-401.7	-693.9	-304	-404.3	-130.8	-747.9																		Florfenicol	27	3
RCI (%)	-59.046	1.57424	3.94745	-4.39131	0.680594	-16.5296	10.8303	-19.5715	-12.1027	-40.3681	0																		Lincomycin	26	4
	Root lenght (cm)																Root lenght (mm)
	Chloramphenicol	Oxytetracycline Hydrochloride	Ofloxacin	Trimethoprim	Azithromycin	Sulfadimidine	Enrofloxacin	Ciprofloxacin	Florfenicol	Lincomycin	Control Group		Treatment	% germination			Chloramphenicol	Oxytetracycline	Ofloxacin	Trimethoprim	Azithromycin	Sulfadimidine	Enrofloxacin	Ciprofloxacin	Florfenicol	Lincomycin	Control Group
	10.744	28.362	18.436	13.3	11.799	21.686	12.732	19.003	28.48	3.509	10.589		Chloramphenicol	83.3333		1	107.44	283.62	184.36	133	117.99	216.86	127.32	190.03	284.8	35.09	105.89
	17.713	9.675	29.424	27.133	9.78	27.863	24.411	25.193	19.874	17.452	28.583		Oxytetracycline	86.6667		2	177.13	96.75	294.24	271.33	97.8	278.63	244.11	251.93	198.74	174.52	285.83
	21.147	23.212	6.525	8.794	32.39	29.716	14.943	28.672	18.928	10.394	29.313		Ofloxacin	86.6667		3	211.47	232.12	65.25	87.94	323.9	297.16	149.43	286.72	189.28	103.94	293.13
	22.808	6.185	27.213	26.089	7.104	22.405	7.565	26.281	7.936	15.743	5.13		Trimethoprim	86.6667		4	228.08	61.85	272.13	260.89	71.04	224.05	75.65	262.81	79.36	157.43	51.3
	22.205	1.24	26.076	33.309	24.684	2.231	21.926	24.289	12.031	27.755	27.054		Azithromycin	86.6667		5	222.05	12.4	260.76	333.09	246.84	22.31	219.26	242.89	120.31	277.55	270.54
	14.904	19.026	24.672	26.975	27.012	22.51	17.097	31.507	29.092	32.025	19.569		Sulfadimidine	93.3333		6	149.04	190.26	246.72	269.75	270.12	225.1	170.97	315.07	290.92	320.25	195.69
	4.033	19.102	20.964	17.331	23.356	32.311	13.541	17.2	6.587	16.786	20.923		Enrofloxacin	80		7	40.33	191.02	209.64	173.31	233.56	323.11	135.41	172	65.87	167.86	209.23
	7.954	26.739	24.479	19.38	12.287	23.53	22.557	27.383	13.396	24.457	19.886		Ciprofloxacin	83.3333		8	79.54	267.39	244.79	193.8	122.87	235.3	225.57	273.83	133.96	244.57	198.86
	22.694	1.206	10.392	9.387	27.658	15.846	15.931	19.407	11.477	12.591	3.479		Florfenicol	90		9	226.94	12.06	103.92	93.87	276.58	158.46	159.31	194.07	114.77	125.91	34.79
	12.052	6.24	17.928	17.404	28.23	15.697	19.256	27.842	18.236	19.529	0.797		Lincomycin	86.6667		10	120.52	62.4	179.28	174.04	282.3	156.97	192.56	278.42	182.36	195.29	7.97
	25.957	23.967	26.144	25.68	17.529	20.56	24.642	26.145	19.782	18.317	15.59		Control	100		11	259.57	239.67	261.44	256.8	175.29	205.6	246.42	261.45	197.82	183.17	155.9
	26.19	19.076	2.178	18.059	26.277	22.12	2.219	27.579	11.732	14.462	21.494					12	261.9	190.76	21.78	180.59	262.77	221.2	22.19	275.79	117.32	144.62	214.94
	2.51	24.316	15.539	28.757	30.237	10.208	11.825	12.635	20.662	30.181	26.152					13	25.1	243.16	155.39	287.57	302.37	102.08	118.25	126.35	206.62	301.81	261.52
	13.356	2.221	11.628	5.888	12.64	9.142	22.235	17.604	9.606	30.791	25.482					14	133.56	22.21	116.28	58.88	126.4	91.42	222.35	176.04	96.06	307.91	254.82
	20.216	20.904	23.441	30.584	20.313	24.48	22.909	31.201	16.419	18.962	16.86					15	202.16	209.04	234.41	305.84	203.13	244.8	229.09	312.01	164.19	189.62	168.6
	12.341	5.106	12.363	22.963	25.664	24.158	6.106	20.86	25.82	29.106	18.756					16	123.41	51.06	123.63	229.63	256.64	241.58	61.06	208.6	258.2	291.06	187.56
	6.73	18.189	15.904	21.752	18.27	22.464	29.891	20.062	18.82	27.948	18.845					17	67.3	181.89	159.04	217.52	182.7	224.64	298.91	200.62	188.2	279.48	188.45
	12.613	14.509	25.952	27.729	23.291	25.544	3.467	13.198	16.709	22.486	10.212					18	126.13	145.09	259.52	277.29	232.91	255.44	34.67	131.98	167.09	224.86	102.12
	10.672	20.139	21.649	34.028	34.636	25.067	7.455	15.247	14.556	31.189	17.778					19	106.72	201.39	216.49	340.28	346.36	250.67	74.55	152.47	145.56	311.89	177.78
	26.092	18.317	21.338	27.516	13.994	24.24	24.119	19.247	23.248	12.382	7.27					20	260.92	183.17	213.38	275.16	139.94	242.4	241.19	192.47	232.48	123.82	72.7
	23.792	12.315	12.087	20.909	19.271	9.755	19.962	27.143	8.412	9.018	22.821					21	237.92	123.15	120.87	209.09	192.71	97.55	199.62	271.43	84.12	90.18	228.21
	14.107	29.62	18.647	21.364	19.962	12.742	19.813	14.744	3.541	15.341	11.266					22	141.07	296.2	186.47	213.64	199.62	127.42	198.13	147.44	35.41	153.41	112.66
	20.979	20.142	16.766	19.327	31.033	4.756	27.176	15.983	2.012	18.066	10.239					23	209.79	201.42	167.66	193.27	310.33	47.56	271.76	159.83	20.12	180.66	102.39
	21.364	17.639	36.535	17.763	18.442	17.401	16.318	4.128	22.433	27.1	16.911					24	213.64	176.39	365.35	177.63	184.42	174.01	163.18	41.28	224.33	271	169.11
	14.305	5.475	30.821	11.44	30.024	32.938		7.696	25.616	12.696	21.862					25	143.05	54.75	308.21	114.4	300.24	329.38		76.96	256.16	126.96	218.62
		3.492	24.43	2.343	24.508	5.129			21.673	25.375	1.391					26		34.92	244.3	23.43	245.08	51.29			216.73	253.75	13.91
		22.49				22.587			1.305		12.566					27		224.9				225.87			13.05		125.66
						9.495					22.724					28						94.95					227.24
											26.904					29											269.04
											26.88					30											268.8
Average	16.2991	15.515	20.0589	20.5848	21.9381	19.1636	17.004	20.81	15.866	20.1408	17.2442					Average	162.991	155.15	200.589	205.848	219.381	191.636	170.04	208.1	158.66	201.408	172.442
Stan	7.01397	8.84344	7.89528	8.35255	7.50559	8.40164	7.62208	7.21725	7.83762	7.86703	8.29703					Median	163.085	182.53	213.38	213.64	233.56	224.05	192.56	204.61	165.64	189.62	188.45
																MIN	25.1	12.06	21.78	23.43	71.04	22.31	22.19	41.28	13.05	90.18	7.97
																MAX	261.9	296.2	365.35	340.28	346.36	329.38	298.91	315.07	290.92	320.25	293.13
																Q1 (25 %)	121.242	60.075	139.51	173.675	178.995	102.08	118.25	154.31	93.075	149.015	107.525
																Q3 (75 %)	225.718	213.005	260.14	273.245	279.44	244.8	229.09	273.23	209.148	278.515	241.515
																IQR	104.475	152.93	120.63	99.57	100.445	142.72	110.84	118.92	116.073	129.5	133.99

## Sheet: SF
													Germination %
Category of antibiotics	Chloramphenicol	Oxytetracycline Hydrochloride	Ofloxacin	Trimethoprim	Azithromycin	Sulfadimidine	Enrofloxacin	Ciprofloxacin	Florfenicol	Lincomycin	Control Group		CHL	OTC	OFL	TMP	AZM	SDM	ENR	CIP	FLOR	LIN	C
Pre-test mass/mg	4348.7	4479.4	4526.8	4346.4	4577.3	4405.5	3910.2	4133.3	4385.5	4510.4	3786		20	0	10	10	10	13.3333	13.3333	6.66667	6.66667	10	33.3333
Number of germinations/30	6	0	3	3	3	4	4	2	2	3	10		20	0	10	10	10	13.3333	13.3333	6.66667	6.66667	10	33.3333
Germination fresh weight/mg	5966.7	0	2946.5	3523.9	2126.7	1513.1	2686	1733.1	2645.6	2966.9	8077
Total fresh weight/mg
Germination dry weight/mg	709.1		497.2	392.4	287.2	375.6	399.1	249.4	468.7	304.9	929.7
Total dry weight/mg
Mean root lenght (cm)	18.7832	0	10.3717	20.5353	16.4013	13.0325	12.697	16.741	18.7625	19.2027	19.9077
	Root lenght (cm)												Root lenght (mm)
	Chloramphenicol	Oxytetracycline Hydrochloride	Ofloxacin	Trimethoprim	Azithromycin	Sulfadimidine	Enrofloxacin	Ciprofloxacin	Florfenicol	Lincomycin	Control Group		Treatment	% germination			Chloramphenicol	Oxytetracycline	Ofloxacin	Trimethoprim	Azithromycin	Sulfadimidine	Enrofloxacin	Ciprofloxacin	Florfenicol	Lincomycin	Control Group
	25.479		18.993	14.516	33.846	19.743	23.852	14.287	24.469	25.456	16.334		Chloramphenicol	20		1	254.79	0	189.93	145.16	338.46	197.43	238.52	142.87	244.69	254.56	163.34
	22.068		8.125	22.544	3.577	2.069	4.27	19.195	13.056	20.601	9.866		Oxytetracycline	0		2	220.68	0	81.25	225.44	35.77	20.69	42.7	191.95	130.56	206.01	98.66
	28.18		3.997	24.546	11.781	19.281	12.033			11.551	36.626		Ofloxacin	10		3	281.8		39.97	245.46	117.81	192.81	120.33			115.51	366.26
	17.207					11.037	10.633				21.587		Trimethoprim	10		4	172.07					110.37	106.33				215.87
	4.005										16.431		Azithromycin	10		5	40.05										164.31
	15.76										16.92		Sulfadimidine	13.3333		6	157.6										169.2
											12.246		Enrofloxacin	13.3333		7											122.46
											12.298		Ciprofloxacin	6.66667		8											122.98
											17.753		Florfenicol	6.66667		9											177.53
											39.016		Lincomycin	10		10											390.16
Average	18.7832		10.3717	20.5353	16.4013	13.0325	12.697	16.741	18.7625	19.2027	19.9077		Control	33.3333		11
Standard deviation	8.64804		7.74633	5.30813	15.6545	8.33176	8.16801	3.47048	8.07021	7.05718	10.0184					12
																13
																14
																15
																16
																17
																18
																19
																20
																21
																22
																23
																24
																25
																26
																27
																28
																29
																30
																Average	187.832	0	103.717	205.353	164.013	130.325	126.97	167.41	187.625	192.027	199.077
																Standard devation	86.4804	0	77.4633	53.0813	156.545	83.3176	81.6801	34.7048	80.7021	70.5718	100.184

## Sheet: LT
													Germination %
Category of antibiotics	Chloramphenicol	Oxytetracycline Hydrochloride	Ofloxacin	Trimethoprim	Azithromycin	Sulfadimidine	Enrofloxacin	Ciprofloxacin	Florfenicol	Lincomycin	Control Group		CHL	OTC	OFL	TMP	AZM	SDM	ENR	CIP	FLOR	LIN	C
Pre-test mass/mg	31.9	34.6	37.4	45.5	36	31.4	38.3	28.6	29.1	26.6	22.8		96.6667	100	96.6667	90	90	100	100	93.3333	90	96.6667	86.6667
Number of germinations/30	29	30	29	27	27	30	30	28	27	29	26		96.6667	100	96.6667	90	90	100	100	93.3333	90	96.6667	86.6667
Germination fresh weight/mg	186.1		456.7	396.8	397			435.9	463	445.3	481.4
Total fresh weight/mg	187.2	458.1	460.1	397.9	400.5	502.8	458.8	436.6	466.4	445.4	483.3
Germination dry weight/mg	42.2		32.7	27.4	21.9			32.9	43.2	71.4	35.7
Total dry weight/mg	43	34.2	34.6	29	23.3	31.9	23.5	34.2	45.8	72.1	37.7
Mean root lenght (cm)	7.28545	7.72807	6.70431	7.92009	7.79211	8.18973	6.30097	6.89514	8.39796	8.16934	7.78404
Δm (mf- mi)	11.1	-0.4	-2.8	-16.5	-12.7	0.5	-14.8	5.6	16.7	45.5	14.9																		Florfenicol	27	3
RCI (%)	-14.0584	9.28382	8.22281	23.0769	38.1963	15.3846	37.6658	9.28382	-21.4854	-91.2467	0																		Lincomycin	29	1
	Root lenght (cm)																Root lenght (mm)
	Chloramphenicol	Oxytetracycline Hydrochloride	Ofloxacin	Trimethoprim	Azithromycin	Sulfadimidine	Enrofloxacin	Ciprofloxacin	Florfenicol	Lincomycin	Control Group		Treatment	% germination			Chloramphenicol	Oxytetracycline	Ofloxacin	Trimethoprim	Azithromycin	Sulfadimidine	Enrofloxacin	Ciprofloxacin	Florfenicol	Lincomycin	Control Group
	5.459	7.033	1.733	10.205	2.256	4.674	5.048	9.878	6.411	6.298	9.589		Chloramphenicol	96.6667		1	54.59	70.33	17.33	102.05	22.56	46.74	50.48	98.78	64.11	62.98	95.89
	9.36	8.841	8.786	2.22	8.853	3.464	7.392	9.838	10.842	8.598	9.944		Oxytetracycline	100		2	93.6	88.41	87.86	22.2	88.53	34.64	73.92	98.38	108.42	85.98	99.44
	9.289	8.19	6.904	9.828	8.662	6.451	2.973	8.114	13.11	6.749	2.405		Ofloxacin	96.6667		3	92.89	81.9	69.04	98.28	86.62	64.51	29.73	81.14	131.1	67.49	24.05
	9.656	8.624	10.657	9.037	6.36	9.272	6.028	8.319	6.405	8.009	7.833		Trimethoprim	90		4	96.56	86.24	106.57	90.37	63.6	92.72	60.28	83.19	64.05	80.09	78.33
	6.658	7.685	10.574	8.23	9.981	11.097	7.995	10.082	11.661	8.905	3.676		Azithromycin	90		5	66.58	76.85	105.74	82.3	99.81	110.97	79.95	100.82	116.61	89.05	36.76
	6.658	8.531	6.906	7.924	7.548	8.243	11.315	8.481	9.466	7.286	11.938		Sulfadimidine	100		6	66.58	85.31	69.06	79.24	75.48	82.43	113.15	84.81	94.66	72.86	119.38
	12.045	4.042	7.029	10.466	9.252	10.589	8.818	2.749	8.673	8.708	8.677		Enrofloxacin	100		7	120.45	40.42	70.29	104.66	92.52	105.89	88.18	27.49	86.73	87.08	86.77
	4.27	8.045	5.651	5.002	9.41	7.737	6.81	3.51	7.471	8.21	7.58		Ciprofloxacin	93.3333		8	42.7	80.45	56.51	50.02	94.1	77.37	68.1	35.1	74.71	82.1	75.8
	5.109	7.433	9.212	9.845	4.393	7.75	9.798	0.925	1.704	8.633	8.083		Florfenicol	90		9	51.09	74.33	92.12	98.45	43.93	77.5	97.98	9.25	17.04	86.33	80.83
	9.602	8.91	8.633	7.441	7.556	10.215	8.322	5.142	6.51	10.062	1.668		Lincomycin	96.6667		10	96.02	89.1	86.33	74.41	75.56	102.15	83.22	51.42	65.1	100.62	16.68
	6.243	9.063	8.561	8.399	7.721	10.46	11.854	8.335	10.059	8.474	8.26		Control	86.6667		11	62.43	90.63	85.61	83.99	77.21	104.6	118.54	83.35	100.59	84.74	82.6
	9.549	7.969	7.851	9.61	9.609	5.474	7.464	6.765	8.609	8.546	10.568					12	95.49	79.69	78.51	96.1	96.09	54.74	74.64	67.65	86.09	85.46	105.68
	5.566	9.215	2.779	2.684	7.716	8.449	8.732	6.811	7.129	6.663	7.914					13	55.66	92.15	27.79	26.84	77.16	84.49	87.32	68.11	71.29	66.63	79.14
	9.263	8.762	0.871	1.116	7.082	9.424	6.667	11.613	8.869	8.843	5.057					14	92.63	87.62	8.71	11.16	70.82	94.24	66.67	116.13	88.69	88.43	50.57
	5.34	4.763	8.467	11.621	0.489	9.229	3.852	10.083	10.9	10.172	8.277					15	53.4	47.63	84.67	116.21	4.89	92.29	38.52	100.83	109	101.72	82.77
	7.058	1.669	8.888	10.23	5.006	9.149	8.04	6.73	8.68	8.458	9.126					16	70.58	16.69	88.88	102.3	50.06	91.49	80.4	67.3	86.8	84.58	91.26
	9.479	9.731	7.473	8.174	10.36	7.151	2.074	6.872	6.95	10.142	9.999					17	94.79	97.31	74.73	81.74	103.6	71.51	20.74	68.72	69.5	101.42	99.99
	2.245	2.098	5.255	11.91	10.765	6.319	8.369	9.919	10.111	8.072	9.656					18	22.45	20.98	52.55	119.1	107.65	63.19	83.69	99.19	101.11	80.72	96.56
	8.871	10.566	9.426	11.025	8.492	6.941	8.162	7.689	8.987	8.242	5.908					19	88.71	105.66	94.26	110.25	84.92	69.41	81.62	76.89	89.87	82.42	59.08
	9.585	10.009	6.839	9.825	7.437	1.81	11.011	4.88	3.479	8.292	8.242					20	95.85	100.09	68.39	98.25	74.37	18.1	110.11	48.8	34.79	82.92	82.42
	8.05	8.91	6.102	3.788	7.03	3.03	5.718	5.833	7.903	7.12	11.047					21	80.5	89.1	61.02	37.88	70.3	30.3	57.18	58.33	79.03	71.2	110.47
	8.624	10.164	7.632	6.209	7.871	11.758	9.899	7.366	10.316	7.489	8.811					22	86.24	101.64	76.32	62.09	78.71	117.58	98.99	73.66	103.16	74.89	88.11
	7.514	9.741	7.997	7.373	11.804	12.364	7.777	9.59	10.565	8.013	6.879					23	75.14	97.41	79.97	73.73	118.04	123.64	77.77	95.9	105.65	80.13	68.79
	8.738	5.211	9.574		5.12	10.374	8.657	3.958	6.602	5.156	9.491					24	87.38	52.11	95.74		51.2	103.74	86.57	39.58	66.02	51.56	94.91
	7.552	9.262	6.265		8.698	6.723	3.039	9.4	4.888	10.102	9.8					25	75.52	92.62	62.65		86.98	67.23	30.39	94	48.88	101.02	98
	3.558	4.68	10.661		10.891	7.667	1.55	2.693	10.036	8.975	1.957					26	35.58	46.8	106.61		108.91	76.67	15.5	26.93	100.36	89.75	19.57
	13.819	8.091	2.006		10.025	8.558	0.316	5.894	10.409	7.074						27	138.19	80.91	20.06		100.25	85.58	3.16	58.94	104.09	70.74
	1.298	9.288	0.969			9.632	0.389	1.595		7.268						28	12.98	92.88	9.69			96.32	3.89	15.95		72.68
	0.82	7.588	0.724			9.461	0.567			8.352						29	8.2	75.88	7.24			94.61	5.67			83.52
						12.227	0.393									30						122.27	3.93
Average	7.28545	7.72807	6.70431	7.92009	7.79211	8.18973	6.30097	6.89514	8.39796	8.16934	7.78404					Average	72.8545	77.2807	67.0431	79.2009	77.9211	81.8973	63.0097	68.9514	83.9796	81.6934	77.8404
Standard deviation	3.01002	2.31526	3.05222	3.06751	2.60166	2.65658	3.4872	2.85289	2.54676	1.18337	2.77411					Median	78.01	85.775	75.525	83.145	81.815	85.58	74.64	68.72	87.745	83.22	82.6
																MIN	8.2	16.69	7.24	11.16	4.89	18.1	3.16	9.25	17.04	51.56	16.68
																MAX	138.19	105.66	106.61	119.1	118.04	123.64	118.54	116.13	131.1	101.72	119.38
																Q1 (25 %)	53.965	74.7175	57.6375	59.0725	70.69	68.32	30.06	48.8	68.63	73.3675	63.935
																Q3 (75 %)	94.4925	92.5025	88.625	99.4125	97.02	102.945	86.945	94	103.393	88.0925	97.28
																IQR	40.5275	17.785	30.9875	40.34	26.33	34.625	56.885	45.2	34.7625	14.725	33.345

## Sheet: RM
													Germination %
Category of antibiotics	Chloramphenicol	Oxytetracycline Hydrochloride	Ofloxacin	Trimethoprim	Azithromycin	Sulfadimidine	Enrofloxacin	Ciprofloxacin	Florfenicol	Lincomycin	Control Group		CHL	OTC	OFL	TMP	AZM	SDM	ENR	CIP	FLOR	LIN	C
Pre-test mass/mg	686.1	700.3	690.7	684.5	698.6	735.7	713.2	718.4	702.3	703.3	730.2		86.6667	93.3333	86.6667	90	83.3333	86.6667	86.6667	96.6667	80	90	90
Number of germinations/30	26	28	26	27	25	26	26	29	24	27	27		86.6667	93.3333	86.6667	90	83.3333	86.6667	86.6667	96.6667	80	90	90
Germination fresh weight/mg	2039.7	2022.1	2278.3	1728.9	1654	2168.8	1924.8	2242.7	2627.8	1868.9	1800
Total fresh weight/mg	2150.8	2093	2388.2	1821.1	1841.2	2309.7	2053.1	2274.5	2727.2	2076.1	1904.6
Germination dry weight/mg	660.2	835.1	750.2	690.4	730.2	830.8	879.8	837.7	828.5	647.9	713.4
Total dry weight/mg	760.7	887.1	814.9	753.4	811.3	914.6	981	862.2	899.8	782.9	787.1
Mean root lenght (cm)	5.135	6.06429	6.22585	6.43459	6.66836	5.94131	5.31285	6.93555	6.58254	5.48485	4.343
Δm (mf- mi)	74.6	186.8	124.2	68.9	112.7	178.9	267.8	143.8	197.5	79.6	56.9																		Florfenicol	24	6
RCI (%)	3.35408	-12.7049	-3.53195	4.28154	-3.07458	-16.1987	-24.6347	-9.54135	-14.3184	0.533604	0																		Lincomycin	27	3
	Root lenght (cm)																Root lenght (mm)
	Chloramphenicol	Oxytetracycline Hydrochloride	Ofloxacin	Trimethoprim	Azithromycin	Sulfadimidine	Enrofloxacin	Ciprofloxacin	Florfenicol	Lincomycin	Control Group		Treatment	% germination			Chloramphenicol	Oxytetracycline	Ofloxacin	Trimethoprim	Azithromycin	Sulfadimidine	Enrofloxacin	Ciprofloxacin	Florfenicol	Lincomycin	Control Group
	7.234	8.242	7.618	5.156	6.497	5.982	6.466	6.888	5.807	6.541	3.605		Chloramphenicol	86.6667		1	72.34	82.42	76.18	51.56	64.97	59.82	64.66	68.88	58.07	65.41	36.05
	6.181	6.382	5.236	8.454	4.965	6.413	4.213	5.754	7.22	5.542	5.798		Oxytetracycline	93.3333		2	61.81	63.82	52.36	84.54	49.65	64.13	42.13	57.54	72.2	55.42	57.98
	3.042	8.191	8.168	6.268	6.244	7.85	5.535	7.268	6.084	5.387	6.284		Ofloxacin	86.6667		3	30.42	81.91	81.68	62.68	62.44	78.5	55.35	72.68	60.84	53.87	62.84
	5.5	8.432	6.24	8.199	6.362	6.858	3.211	6.185	6.762	5.92	4.636		Trimethoprim	90		4	55	84.32	62.4	81.99	63.62	68.58	32.11	61.85	67.62	59.2	46.36
	3.922	7.299	7.312	7.446	10.211	7.164	6.926	8.469	8.715	5.727	0.945		Azithromycin	83.3333		5	39.22	72.99	73.12	74.46	102.11	71.64	69.26	84.69	87.15	57.27	9.45
	8.399	4.906	6.514	6.698	2.234	6.196	4.519	3.152	8.058	5.844	1.303		Sulfadimidine	86.6667		6	83.99	49.06	65.14	66.98	22.34	61.96	45.19	31.52	80.58	58.44	13.03
	3.712	2.03	2.627	6.748	6.879	6.313	6.3	9.584	6.255	5.774	7.786		Enrofloxacin	86.6667		7	37.12	20.3	26.27	67.48	68.79	63.13	63	95.84	62.55	57.74	77.86
	4.075	0.97	3.695	7.348	3.495	4.119	7.686	9.275	2.156	5.881	2.262		Ciprofloxacin	96.6667		8	40.75	9.7	36.95	73.48	34.95	41.19	76.86	92.75	21.56	58.81	22.62
	4.627	6.508	8.313	6.27	5.882	8.664	3.203	6.183	6.457	3.016	5.168		Florfenicol	80		9	46.27	65.08	83.13	62.7	58.82	86.64	32.03	61.83	64.57	30.16	51.68
	4.222	5.964	6.486	6.898	6.863	8.382	2.115	8.03	6.355	4.784	4.813		Lincomycin	90		10	42.22	59.64	64.86	68.98	68.63	83.82	21.15	80.3	63.55	47.84	48.13
	0.828	6.2	4.182	8.871	6.26	2.469	1.238	6.913	2.837	7.463	5.657		Control	90		11	8.28	62	41.82	88.71	62.6	24.69	12.38	69.13	28.37	74.63	56.57
	0.679	7.946	5.715	3.619	9.104	8.808	8.547	7.646	3.136	5.275	1.68					12	6.79	79.46	57.15	36.19	91.04	88.08	85.47	76.46	31.36	52.75	16.8
	4.509	1.175	6.623	7.062	6.511	6.083	6.709	8.32	6.252	7.066	4.693					13	45.09	11.75	66.23	70.62	65.11	60.83	67.09	83.2	62.52	70.66	46.93
	8.178	3.758	5.631	7.629	5.43	7.21	6.325	7.046	8.816	1.771	3.731					14	81.78	37.58	56.31	76.29	54.3	72.1	63.25	70.46	88.16	17.71	37.31
	7.053	9.353	6.458	7.605	8.252	2.885	6.671	8.482	8.375	3.652	4.151					15	70.53	93.53	64.58	76.05	82.52	28.85	66.71	84.82	83.75	36.52	41.51
	5.074	9.028	6.591	4.978	8.952	6.763	6.932	5.046	5.71	3.275	3.47					16	50.74	90.28	65.91	49.78	89.52	67.63	69.32	50.46	57.1	32.75	34.7
	6.312	7.228	8.403	5.487	4.773	5.399	7.281	7.958	6.916	6.076	6.855					17	63.12	72.28	84.03	54.87	47.73	53.99	72.81	79.58	69.16	60.76	68.55
	4.33	6.718	7.232	7.228	9.808	4.849	5.396	9.795	9.934	6.465	4.219					18	43.3	67.18	72.32	72.28	98.08	48.49	53.96	97.95	99.34	64.65	42.19
	9.861	6.32	5.732	5.668	5.111	8.243	1.919	1.203	6.699	4.898	2.271					19	98.61	63.2	57.32	56.68	51.11	82.43	19.19	12.03	66.99	48.98	22.71
	4.256	8.9	7.187	2.469	6.279	2.375	6.583	9.509	7.622	4.861	6.075					20	42.56	89	71.87	24.69	62.79	23.75	65.83	95.09	76.22	48.61	60.75
	5.268	1.982	8.515	6.683	5.562	6.992	4.458	9.067	7.801	6.238	5.042					21	52.68	19.82	85.15	66.83	55.62	69.92	44.58	90.67	78.01	62.38	50.42
	6.207	5.134	1.962	5.824	3.861	7.133	7.98	2.683	8.121	5.694	7.229					22	62.07	51.34	19.62	58.24	38.61	71.33	79.8	26.83	81.21	56.94	72.29
	6.849	8.696	8.049	7.257	10.697	4.202	6.848	4.313	8.332	6.376	6.373					23	68.49	86.96	80.49	72.57	106.97	42.02	68.48	43.13	83.32	63.76	63.73
	0.897	5.27	9.256	6.182	9.482	6.888	5.869	6.378	3.561	8.22	2.627					24	8.97	52.7	92.56	61.82	94.82	68.88	58.69	63.78	35.61	82.2	26.27
	8.346	6.507	7.861	6.522	6.995	4.115	4.282	8.208		6.67	7.206					25	83.46	65.07	78.61	65.22	69.95	41.15	42.82	82.08		66.7	72.06
	3.949	6.219	0.266	1.63		2.119	0.922	6.874		6.035	3.108					26	39.49	62.19	2.66	16.3		21.19	9.22	68.74		60.35	31.08
		5.583		9.535				8.278		3.64	0.274					27		55.83		95.35				82.78		36.4	2.74
		4.859						4.853								28		48.59						48.53
								7.771								29								77.71
																30
Average	5.135	6.06429	6.22585	6.43459	6.66836	5.94131	5.31285	6.93555	6.58254	5.48485	4.343					Average	51.35	60.6429	62.2585	64.3459	66.6836	59.4131	53.1285	69.3555	65.8254	54.8485	43.43
Standad deviation	2.34131	2.35337	2.17173	1.77608	2.15014	1.98909	2.1344	2.14117	1.99173	1.42593	2.05954					Median	46.27	63.2	65.14	67.23	63.205	64.13	58.69	74.57	67.62	57.505	46.645
																MIN	6.79	9.7	2.66	16.3	22.34	21.19	9.22	12.03	21.56	17.71	2.74
																MAX	98.61	93.53	92.56	95.35	106.97	88.08	85.47	97.95	99.34	82.2	77.86
																Q1 (25 %)	39.355	49.06	54.335	57.85	51.9075	41.605	37.12	58.6125	60.84	48.4175	25.38
																Q3 (75 %)	65.805	79.46	79.55	74.8575	87.77	71.87	68.87	84.3175	81.21	62.725	61.2725
																IQR	26.45	30.4	25.215	17.0075	35.8625	30.265	31.75	25.705	20.37	14.3075	35.8925

## Sheet: CC
													Germination %
Category of antibiotics	Chloramphenicol	Oxytetracycline Hydrochloride	Ofloxacin	Trimethoprim	Azithromycin	Sulfadimidine	Enrofloxacin	Ciprofloxacin	Florfenicol	Lincomycin	Control Group		CHL	OTC	OFL	TMP	AZM	SDM	ENR	CIP	FLOR	LIN	C
Pre-test mass/mg	89.4	80.8	60.4	57.1	68.2	82.8	67.9	59.3	58.5	62.9	73		83.3333	86.6667	90	86.6667	83.3333	93.3333	93.3333	76.6667	16.6667	73.3333	86.6667
Number of germinations/30	25	26	27	26	25	28	28	23	5	22	26		83.3333	86.6667	90	86.6667	83.3333	93.3333	93.3333	76.6667	16.6667	73.3333	86.6667
Germination fresh weight/mg	814.2	855.1	838.3	643	747.3	1050.2	984.6	728.7	62.8	383.1	674.4
Total fresh weight/mg	829.4	867.1	847.3	649.4	770.2	1059.6	995.5	783.5		416.3	683
Germination dry weight/mg	86.9	63.2	44.8	44.5	36.1	63.6	53.9	59.8	4.1	44.8	42.6
Total dry weight/mg	89.1	66.6	50.4	47.8	42.9	75.5	55.7	69.4		50.6	47.8
Mean root lenght (cm)	2.73992	3.47738	3.37967	1.96454	3.55248	3.27232	2.94664	3.08687	1.312	1.22645	2.44023
Δm (mf- mi)	-0.3	-14.2	-10	-9.3	-25.3	-7.3	-12.2	10.1	-58.5	-12.3	-25.2																		Florfenicol	5	25
RCI (%)	-86.4017	-39.3305	-5.43933	0	10.251	-57.9498	-16.5272	-45.1883	100	-5.85774	0																		Lincomycin	22	8
	Root lenght (cm)																Root lenght (mm)
	Chloramphenicol	Oxytetracycline Hydrochloride	Ofloxacin	Trimethoprim	Azithromycin	Sulfadimidine	Enrofloxacin	Ciprofloxacin	Florfenicol	Lincomycin	Control Group		Treatment	% germination			Chloramphenicol	Oxytetracycline	Ofloxacin	Trimethoprim	Azithromycin	Sulfadimidine	Enrofloxacin	Ciprofloxacin	Florfenicol	Lincomycin	Control Group
	2.135	6.178	6.058	6.388	1.397	4.508	4.39	0.872	1.716	2.435	3.301		Chloramphenicol	83.3333		1	21.35	61.78	60.58	63.88	13.97	45.08	43.9	8.72	17.16	24.35	33.01
	5.405	8.95	3.312	1.478	2.884	2.068	4.477	3.07	1.127	1.906	4.002		Oxytetracycline	86.6667		2	54.05	89.5	33.12	14.78	28.84	20.68	44.77	30.7	11.27	19.06	40.02
	2.223	4.057	2.801	0.637	1.301	9.267	2.493	3.089	0.925	1.673	2.091		Ofloxacin	90		3	22.23	40.57	28.01	6.37	13.01	92.67	24.93	30.89	9.25	16.73	20.91
	1.86	3.229	3.283	2.81	1.492	1.788	2.896	4.508	1.433	1.514	1.812		Trimethoprim	86.6667		4	18.6	32.29	32.83	28.1	14.92	17.88	28.96	45.08	14.33	15.14	18.12
	2.152	8.406	3.02	1.479	1.379	1.143	6.06	4.23	1.359	0.903	1.125		Azithromycin	83.3333		5	21.52	84.06	30.2	14.79	13.79	11.43	60.6	42.3	13.59	9.03	11.25
	2.937	2.11	1.134	4.375	4.982	3.281	5.011	3.602		1.498	1.63		Sulfadimidine	93.3333		6	29.37	21.1	11.34	43.75	49.82	32.81	50.11	36.02		14.98	16.3
	0.781	2.237	9.365	2.417	2.165	0.617	6.942	1.101		1.175	2.59		Enrofloxacin	93.3333		7	7.81	22.37	93.65	24.17	21.65	6.17	69.42	11.01		11.75	25.9
	6.351	1.086	2.72	4.063	6.455	2.018	3.001	3.311		2.04	0.59		Ciprofloxacin	76.6667		8	63.51	10.86	27.2	40.63	64.55	20.18	30.01	33.11		20.4	5.9
	1.358	0.327	1.27	4.302	3.81	4.462	0.504	9.72		1.105	0.247		Florfenicol	16.6667		9	13.58	3.27	12.7	43.02	38.1	44.62	5.04	97.2		11.05	2.47
	3.756	3.726	0.595	1.393	3.623	1.413	0.458	3.992		0.63	0.815		Lincomycin	73.3333		10	37.56	37.26	5.95	13.93	36.23	14.13	4.58	39.92		6.3	8.15
	2.087	5.414	4.955	1.276	2.447	0.951	4.032	2.357		1.383	0.923		Control	86.6667		11	20.87	54.14	49.55	12.76	24.47	9.51	40.32	23.57		13.83	9.23
	1.981	0.649	5.904	0.998	1.444	4.422	2.131	2.777		0.464	1.237					12	19.81	6.49	59.04	9.98	14.44	44.22	21.31	27.77		4.64	12.37
	1.562	0.686	2.603	0.461	4.984	5.324	1.379	1.666		0.7	1.761					13	15.62	6.86	26.03	4.61	49.84	53.24	13.79	16.66		7	17.61
	1.582	0.742	3.694	1.06	6.429	2.473	2.014	1.742		0.661	0.225					14	15.82	7.42	36.94	10.6	64.29	24.73	20.14	17.42		6.61	2.25
	1.812	1.876	2.272	1.005	2.73	4.023	0.567	2.202		1.473	1.448					15	18.12	18.76	22.72	10.05	27.3	40.23	5.67	22.02		14.73	14.48
	2.845	1.257	5.964	2.013	6.416	0.644	4.422	0.937		0.619	2.869					16	28.45	12.57	59.64	20.13	64.16	6.44	44.22	9.37		6.19	28.69
	0.806	3.222	3.338	2.168	1.155	7.635	0.699	1.46		0.334	8.288					17	8.06	32.22	33.38	21.68	11.55	76.35	6.99	14.6		3.34	82.88
	4.169	7.198	2.677	1.269	4.417	5.44	2.939	2.292		0.74	4.253					18	41.69	71.98	26.77	12.69	44.17	54.4	29.39	22.92		7.4	42.53
	3.214	3.183	5.059	1.89	1.765	3.611	3.786	1.369		1.37	4.234					19	32.14	31.83	50.59	18.9	17.65	36.11	37.86	13.69		13.7	42.34
	3.95	0.526	5.361	1.69	14.74	2.351	1.657	3.545		0.604	7.139					20	39.5	5.26	53.61	16.9	147.4	23.51	16.57	35.45		6.04	71.39
	2.389	2.364	3.556	1.298	1.673	8.086	2.536	3.402		2.146	6.432					21	23.89	23.64	35.56	12.98	16.73	80.86	25.36	34.02		21.46	64.32
	0.832	3.164	0.932	0.554	3.751	0.58	1.675	3.351		1.609	1.819					22	8.32	31.64	9.32	5.54	37.51	5.8	16.75	33.51		16.09	18.19
	0.333	6.195	3.244	0.326	3.986	4.553	2.883	6.403			3.114					23	3.33	61.95	32.44	3.26	39.86	45.53	28.83	64.03			31.14
	1.332	2.194	4.345	0.992	2.788	3.81	1.994				0.363					24	13.32	21.94	43.45	9.92	27.88	38.1	19.94				3.63
	10.646	6.33	0.686	0.583	0.599	1.377	1.997				0.923					25	106.46	63.3	6.86	5.83	5.99	13.77	19.97				9.23
		5.106	0.563	4.153		3.254	1.574				0.215					26		51.06	5.63	41.53		32.54	15.74				2.15
			2.54			1.284	5.456									27			25.4			12.84	54.56
						1.242	4.533									28						12.42	45.33
																29
																30
Average	2.73992	3.47738	3.37967	1.96454	3.55248	3.27232	2.94664	3.08687	1.312	1.22645	2.44023					Average	27.3992	34.7738	33.7967	19.6454	35.5248	32.7232	29.4664	30.8687	13.12	12.2645	24.4023
Standadr deviation	2.1874	2.52531	2.04497	1.51663	2.91821	2.33246	1.73675	1.96302	0.301687	0.596953	2.17613					Median	21.195	31.64	31.32	13.93	28.36	24.73	25.36	30.795	12.43	11.75	17.61
																MIN	3.33	3.27	5.63	3.26	5.99	5.8	4.58	9.37	9.25	3.34	2.15
																MAX	106.46	89.5	93.65	43.75	147.4	92.67	69.42	97.2	14.33	21.46	82.88
																Q1 (25 %)	14.09	11.715	20.215	9.95	15.3725	12.84	16.57	17.23	9.755	6.455	8.69
																Q3 (75 %)	36.205	52.6	44.975	22.925	48.4075	44.62	44.22	36.995	14.145	15.615	35.58
																IQR	22.115	40.885	24.76	12.975	33.035	31.78	27.65	19.765	4.39	9.16	26.89

## Sheet: CH
Category of antibiotics	Chloramphenicol	Oxytetracycline Hydrochloride	Ofloxacin	Trimethoprim	Azithromycin	Sulfadimidine	Enrofloxacin	Ciprofloxacin	Florfenicol	Lincomycin	Control Group
Pre-test mass/mg	711.1	696.4	702.4	632.8	717.4	692.7	674.9	679.8	658.8	747.3	646.9
Number of germinations/30
Germination fresh weight/mg
Total fresh weight/mg
Germination dry weight/mg
Total dry weight/mg
Root lenght (cm)	No germination	No germination	No germination	No germination	No germination	No germination	No germination	No germination	No germination	No germination	No germination

## Sheet: LM
													Germination %
Category of antibiotics	Chloramphenicol	Oxytetracycline Hydrochloride	Ofloxacin	Trimethoprim	Azithromycin	Sulfadimidine	Enrofloxacin	Ciprofloxacin	Florfenicol	Lincomycin	Control Group		CHL	OTC	OFL	TMP	AZM	SDM	ENR	CIP	FLOR	LIN	C
Pre-test mass/mg	13.1	12.5	15.8	13.4	14	13.1	14.1	16.6	14.8	12.3	13.7		26.6667	13.3333	26.6667	33.3333	16.6667	13.3333	33.3333	16.6667	13.3333	23.3333	16.6667	Only count 4
Number of germinations/30	8	4	8	10	5	4	10	5	4	7	5		26.6667	13.3333	26.6667	40	16.6667	13.3333	33.3333	16.6667	23.3333	23.3333	16.6667	10
Germination fresh weight/mg	68.2	45.4	61.9	49.9	42.3	53.5	50.4	65.2	65.7	49.5	40.2
Total fresh weight/mg
Germination dry weight/mg	14.9	14.3	16.3	10.5	12.7	11.7	10.6	9.8	10.2	10	11.1
Total dry weight/mg
Mean root lenght (cm)	2.31612	1.913	2.16375	1.9667	1.9568	2.64775	1.7858	2.2976	1.16975	1.38143	2.4562
Δm (mf- mi)	1.8	1.8	0.5	-2.9	-1.3	-1.4	-3.5	-6.8	-4.6	-2.3	-2.6																		Florfenicol	4	26
RCI (%)	-34.2342	-28.8288	-46.8468	5.40541	-14.4144	-5.40541	4.5045	11.7117	8.10811	9.90991	0																		Lincomycin	7	23
	Root lenght (cm)																Root lenght (mm)
	CHL	OTC	OFL	TMP	AZM	SDM	ENR	CIP	FLOR	LIN	C		Treatment	% germination			Chloramphenicol	Oxytetracycline	Ofloxacin	Trimethoprim	Azithromycin	Sulfadimidine	Enrofloxacin	Ciprofloxacin	Florfenicol	Lincomycin	Control Group
	3.834	3.259	2.24	1.089	1.897	2.299	2.145	3.649	2.246	2.459	2.045		Chloramphenicol	26.6667		1	38.34	32.59	22.4	10.89	18.97	22.99	21.45	36.49	22.46	24.59	20.45
	2.729	0.351	2.115	0.671	1.655	3.489	1.974	1.372	0.624	2.36	3.925		Oxytetracycline	13.3333		2	27.29	3.51	21.15	6.71	16.55	34.89	19.74	13.72	6.24	23.6	39.25
	0.745	2.848	3.576	1.078	3.022	3.743	4.297	2.775	0.749	1.305	0.926		Ofloxacin	26.6667		3	7.45	28.48	35.76	10.78	30.22	37.43	42.97	27.75	7.49	13.05	9.26
	3.003	1.194	3.076	1.342	0.94	1.06	0.989	2.92	1.06	1.72	4.352		Trimethoprim	33.3333		4	30.03	11.94	30.76	13.42	9.4	10.6	9.89	29.2	10.6	17.2	43.52
	2.071		0.761	1.84	2.27		0.924	0.772		0.547	1.033		Azithromycin	16.6667		5	20.71		7.61	18.4	22.7		9.24	7.72		5.47	10.33
	4.141		2.834	2.94			0.758			0.875			Sulfadimidine	13.3333		6	41.41		28.34	29.4			7.58			8.75
	0.718		0.968	4.141			2.429			0.404			Enrofloxacin	33.3333		7	7.18		9.68	41.41			24.29			4.04
	1.288		1.74	4.189			2.709						Ciprofloxacin	16.6667		8	12.88		17.4	41.89			27.09
				1.288			0.731						Florfenicol	13.3333		9				12.88			7.31
				1.089			0.902						Lincomycin	23.3333		10				10.89			9.02
													Control	16.6667		11
																12
																13
																14
																15
																16
																17
																18
																19
																20
																21
																22
																23
																24
																25
																26
																27
																28
																29
																30
Avergae	2.31612	1.913	2.16375	1.9667	1.9568	2.64775	1.7858	2.2976	1.16975	1.38143	2.4562					Average	23.1612	19.13	21.6375	19.667	19.568	26.4775	17.858	22.976	11.6975	13.8143	24.562
SD	1.33181	1.37146	0.990034	1.3119	0.768324	1.23151	1.15779	1.18593	0.740548	0.831399	1.60371					Median	20.71	11.94	21.15	13.42	19.625	34.89	9.89	20.735	7.49	10.9	24.79
																MIN	7.18	3.51	7.61	6.71	9.4	10.6	7.31	7.72	6.24	4.04	9.26
																MAX	41.41	28.48	35.76	41.89	30.22	37.43	42.97	29.2	10.6	23.6	43.52
																Q1 (25 %)	7.45	3.51	9.68	10.835	11.1875	10.6	8.3	9.22	6.24	5.1125	9.5275
																Q3 (75 %)	30.03	28.48	30.76	35.405	28.34	37.43	25.69	28.8375	10.6	18.8	42.4525
																IQR	22.58	24.97	21.08	24.57	17.1525	26.83	17.39	19.6175	4.36	13.6875	32.925
