# Supplementary material
Source: Royal Society of Chemistry journal article supplement (doi:10.1039/d6em00053c)
Supplement: d6em00053c2.xlsx [file d6em00053c2.xlsx]

## Sheet: Resumen
	% Germition													Δ mass (mg) (mi - mfDry)
		Tomato	Cempasuchil	Carnation	Alfalfa										Tomato	Cempasuchil	Carnation	Alfalfa
	Azithromycin	40	90	46.6667	70									Azithromycin	-1.3	-3.56667	-2.56667	-8.23333
	Ciprofloxacin	40	86.6667	80	73.3333									Ciprofloxacin	-4.9	-2.76667	-1.5	-8.1
	Oxytetracycline	53.3333	86.6667	80	100									Oxytetracycline	-1.33333	-7.46667	-1	-6.86667
	Trimethoprim	46.6667	66.6667	83.3333	93.3333									Trimethoprim	-1.43333	-4.66667	-2.7	-7.16667
	No pharms	40	78.3333	68.3333	93.3333									No pharms	-1.56667	-4.71667	-2.56667	-8.81667
		% SD	% SD	% SD	% SD										SD (mg)	SD (mg)	SD (mg)	SD (mg)
	Azithromycin	10	10	11.547	10									Azithromycin	0.43589	2.00083	0.568624	2.6727
	Ciprofloxacin	10	15.2753	10	5.7735									Ciprofloxacin	0.984886	2.5482	0.953939	1.12694
	Oxytetracycline	15.2753	5.7735	10	0									Oxytetracycline	0.208167	1.20554	0.7	0.602771
	Trimethoprim	20.8167	5.7735	5.7735	5.7735									Trimethoprim	0.665833	0.288675	2.93087	0.550757
	No pharms	8.94427	11.6905	14.7196	8.16497									No pharms	0.42269	2.58567	1.27698	1.70812
	Root lenght (cm)													% Pharm sorption
		Tomato	Cempasuchil	Carnation	Alfalfa										Tomato	Cempasuchil	Carnation	Alfalfa	No seeds
	Azithromycin	0.632833	6.02741	0.477571	2.47267									Azithromycin	84.6709	84.6619	56.1701	57.4412	46.637
	Ciprofloxacin	0.549083	3.80638	0.51925	3.41609									Ciprofloxacin	75.5219	79.9404	58.739	53.7318	58.4056
	Oxytetracycline	0.540938	7.40977	0.580174	3.92987									Oxytetracycline	30.317	17.89	32.7017	10.8171	31.5094
	Trimethoprim	0.477	7.56965	0.85704	3.67107									Trimethoprim	5.25535	22.663	14.4741	13.3496	12.6641
	No pharms	0.388167	6.09434	0.501244	1.99248										% SD	% SD	% SD	% SD	% SD
		SD (cm)	SD (cm)	SD (cm)	SD (cm)									Azithromycin	4.1864	2.86327	9.07731	5.9564	7.38093
	Azithromycin	0.497725	3.43651	0.305186	2.57665									Ciprofloxacin	4.6514	7.79911	12.2971	12.3745	8.33236
	Ciprofloxacin	0.326423	2.41348	0.462722	2.80964									Oxytetracycline	14.054	7.85435	2.16344	7.73898	9.08756
	Oxytetracycline	0.304904	4.38301	0.341341	2.24521									Trimethoprim	3.15679	5.39877	6.67829	1.80734	9.41318
	Trimethoprim	0.375047	4.57014	0.737776	2.79696
	No pharms	0.227267	3.92922	0.415801	2.30432

## Sheet: Tomato 
	Seedling emergence test
																						Petri dish
	Petri dish	Initial	Final	Pharm	Name	mInitial (mg)	mBeaker (mg)	mWet (mg)	mDry (mg)	mfDry-mi (mg)	CInitial (mg/L)	Cfinal (mg/L)	% Sorption (mg)	Start of germination	Germinated seeds	Avareage Length (cm)	Lenght SD (cm)	Fungal growth	Observations		No.	1	2	3	4	5	6	7	8	9
	1	2025-01-15	2025-01-22	Azithromycin	GER-001	26.6	8009.2		25.5	-1.1	0.889193	0.173638	80.4724	20/012025	4	0.1515	0.0911025	Minimal fungal growth, some small micelles	The seeds need more time for a better percentage of germination, which is problematic for short-term experiments		1	0.071	1.764	0.191	0.658	0.655	0.828	0.847	0.223	0.363
	2	2025-01-15	2025-01-22	Azithromycin	GER-002	27.7	7967.2		25.9	-1.8	0.900644	0.137842	84.6951	20/012025	5	1.0336	0.682381	No visible fungal growth			2	0.151	1.211	1.033	0.695	0.283	0.297	0.792	0.444	0.292
	3	2025-01-15	2025-01-22	Azithromycin	GER-003	24.6	7985.4		23.6	-1	0.894424	0.0997721	88.8451	20/012025	3	0.606667	0.421101	Minimal fungal growth, some small micelles			3	0.279	0.35	0.596	0.389	0.562	0.254	1.141	0.394	0.508
	4	2025-01-15	2025-01-22	Control	GER-004	27.5	7861.3		26.6	-0.9	No pharms	No pharms	No pharms	20/012025	4	0.4905	0.226089	Minimal fungal growth			4	0.105	1.556		0.22	0.406		0.258		0.264
	5	2025-01-15	2025-01-22	Control	GER-005	28.1	8080.5		26.1	-2	No pharms	No pharms	No pharms	20/012025	5	0.449	0.155491	Minimal fungal growth			5		0.287			0.339		1.063
	6	2025-01-15	2025-01-22	Control	GER-006	27.1	8303.7		25.4	-1.7	No pharms	No pharms	No pharms	20/012025	3	0.459667	0.31971	Minimal fungal growth			6
	7	2025-01-15	2025-01-22	Ciprofloxacin	GER-007	25.3	7962.4		21.2	-4.1	1.06635	0.260576	75.5637	20/012025	5	0.8202	0.34621	Minimal fungal growth			7
	8	2025-01-15	2025-01-22	Ciprofloxacin	GER-008	28.1	7736.8		23.5	-4.6	1.23303	0.244728	80.1523	20/012025	3	0.353667	0.115889	No visible fungal growth			8
	9	2025-01-15	2025-01-22	Ciprofloxacin	GER-009	26.5	8147.9		20.5	-6	1.2183	0.355137	70.8498	20/012025	4	0.35675	0.109104	No visible fungal growth			9
	19	2025-01-15	2025-01-22	Azithromycin	CNT-001	No seeds	No seeds		No seeds	No seeds	0.889193	0.461998	48.043	No seeds	No seeds	No seeds	No seeds	No visible fungal growth	The filter paper in the Petri dishes apparently adsorb the most of the pharms in the medium		10
	20	2025-01-15	2025-01-22	Azithromycin	CNT-002	No seeds	No seeds		No seeds	No seeds	0.900644	0.504725	43.9595	No seeds	No seeds	No seeds	No seeds	No visible fungal growth			Mean	0.1515	1.0336	0.606667	0.4905	0.449	0.459667	0.8202	0.353667	0.35675
	21	2025-01-15	2025-01-22	Azithromycin	CNT-003	No seeds	No seeds		No seeds	No seeds	0.894424	0.499315	44.1747	No seeds	No seeds	No seeds	No seeds	No visible fungal growth			SD	0.0911025	0.682381	0.421101	0.226089	0.155491	0.31971	0.34621	0.115889	0.109104
	22	2025-01-15	2025-01-22	Ciprofloxacin	CNT-004	No seeds	No seeds		No seeds	No seeds	1.06635	0.501599	52.961	No seeds	No seeds	No seeds	No seeds	No visible fungal growth
	23	2025-01-15	2025-01-22	Ciprofloxacin	CNT-005	No seeds	No seeds		No seeds	No seeds	1.23303	0.504668	59.0709	No seeds	No seeds	No seeds	No seeds	No visible fungal growth
	24	2025-01-15	2025-01-22	Ciprofloxacin	CNT-006	No seeds	No seeds		No seeds	No seeds	1.2183	0.460703	62.1848	No seeds	No seeds	No seeds	No seeds	No visible fungal growth
																						Petri dish
	Petri dish	Initial	Final	Pharm	Name	mInitial (mg)	mBeaker (mg)	mWet (mg)	mDry (mg)	mfDry-mi (mg)	CInitial (mg/L)	Cfinal (mg/L)	% Sorption	Start of germination	Germinated seeds	Avareage Length (cm)	Lenght SD (cm)	Fungal growth	Observations		No.	1	2	3	4	5	6	7	8	9
	1	2025-01-23	2025-01-30	Oxytetracycline	GER-001	28.1	7953.6	165.6	26.6	-1.5	0.978142	0.523417	46.4887	2025-01-29	4	0.44125	0.28493	Minimal fungal growth, some small micelles	As the previuos experiments, the seeds need more timeof expousure in order to reach better end-points		1	0.808	0.563	0.369	0.28	0.206	0.741	0.417	0.795	0.166
	2	2025-01-23	2025-01-30	Oxytetracycline	GER-002	27.5	8181.1	194	26.4	-1.1	0.912174	0.698695	23.4033	2025-01-29	7	0.61	0.318021	Minimal fungal growth, some small micelles			2	0.261	0.396	0.305	0.377	0.172	1.248	0.729	0.121	0.267
	3	2025-01-23	2025-01-30	Oxytetracycline	GER-003	26.8	7615.1	154.5	25.4	-1.4	0.901297	0.711491	21.0592	2025-01-29	5	0.524	0.342615	Minimal fungal growth, some small micelles			3	0.52	0.688	0.736	0.164	0.202	0.537	0.368	0.18	0.232
	4	2025-01-23	2025-01-30	Trimethoprim	GER-004	25.9	8326.6	177.1	25.2	-0.7	0.91571	0.884677	3.38897	2025-01-28	4	0.253	0.0963846	Minimal fungal growth			4	0.176	0.449	1.017	0.191		0.712	0.189		0.163
	5	2025-01-23	2025-01-30	Trimethoprim	GER-005	29.5	8025	161.8	27.5	-2	0.93794	0.905329	3.47693	2025-01-28	3	0.193333	0.0185831	Minimal fungal growth			5		1.102	0.193			0.436	0.103
	6	2025-01-23	2025-01-30	Trimethoprim	GER-006	29.2	8032.4	198.6	27.6	-1.6	0.937699	0.854242	8.90014	2025-01-28	7	0.726571	0.391985	Minimal fungal growth			6		0.906				1.22
	7	2025-01-23	2025-01-30	Control	GER-007	23.2	8521.1	84.1	21.8	-1.4	No pharms	No pharms	No pharms	2025-01-29	5	0.3612	0.242259	Minimal fungal growth			7		0.166				0.192
	8	2025-01-23	2025-01-30	Control	GER-008	27.9	7884.2	170.4	26.5	-1.4	No pharms	No pharms	No pharms	2025-01-29	3	0.365333	0.37327	Minimal fungal growth			8
	9	2025-01-23	2025-01-30	Control	GER-009	28.3	8093.6	169.7	26.3	-2	No pharms	No pharms	No pharms	2025-01-29	4	0.207	0.0511273	Minimal fungal growth			9
	19	2025-01-23	2025-01-30	Oxytetracycline	CNT-001	No seeds	No seeds	No seeds	No seeds	No seeds	0.978142	0.454425	53.542	No seeds	No seeds	No seeds	No seeds	No visible fungal growth			10
	20	2025-01-23	2025-01-30	Oxytetracycline	CNT-002	No seeds	No seeds	No seeds	No seeds	No seeds	0.912174	0.518254	43.1848	No seeds	No seeds	No seeds	No seeds	No visible fungal growth			Mean	0.44125	0.61	0.524	0.253	0.193333	0.726571	0.3612	0.365333	0.207
	21	2025-01-23	2025-01-30	Oxytetracycline	CNT-003	No seeds	No seeds	No seeds	No seeds	No seeds	0.901297	0.455128	49.503	No seeds	No seeds	No seeds	No seeds	No visible fungal growth			SD	0.28493	0.318021	0.342615	0.0963846	0.0185831	0.391985	0.242259	0.37327	0.0511273
	22	2025-01-23	2025-01-30	Trimethoprim	CNT-004	No seeds	No seeds	No seeds	No seeds	No seeds	0.91571	0.877551	4.1671	No seeds	No seeds	No seeds	No seeds	No visible fungal growth
	23	2025-01-23	2025-01-30	Trimethoprim	CNT-005	No seeds	No seeds	No seeds	No seeds	No seeds	0.93794	0.858261	8.49514	No seeds	No seeds	No seeds	No seeds	No visible fungal growth
	24	2025-01-23	2025-01-30	Trimethoprim	CNT-006	No seeds	No seeds	No seeds	No seeds	No seeds	0.937699	0.859316	8.35902	No seeds	No seeds	No seeds	No seeds	No visible fungal growth
																								1	0.002	217.394	18.494	187.023	236.623	0.166
																								2	0.002	229.518	24.913	126.8	246.804	0.267
																								3	0.002	218.058	14.88	181.033	233.635	0.232
																								4	0.002	198.059	40.216	83.61	222.886	0.163
									Δm (mfinal-minitial)

## Sheet: Cempasuchil 
	Seedling emergence test
																						Petri dish
	Petri dish	Initial	Final	Pharm	Name	mInitial (mg)	mBeaker (mg)		mDry (mg)	mfDry-mi (mg)	CInitial (mg/L)	Cfinal (mg/L)	% Sorption	Start of germination	Germinated seeds	Avareage Length (cm)	Lenght SD (cm)	Fungal growth	Observations		No.	10	11	12	13	14	15	16	17	18
	10	2025-01-15	2025-01-22	Azithromycin	GER-010	30.1	8006.5		24.5	-5.6	0.889193	0.112235	87.3779	2025-01-17	9	5.56422	1.99917	No visible fungal growth	In most cases, the majority of the seeds showed complete germination. However, some issues with fungal growth were observed despite using filtered water. The seeds that failed to germinate were surrounded by fungal.		1	6.377	8.788	4.524	7.201	4.666	6.486	3.892	7.784	4.726
	11	2025-01-15	2025-01-22	Azithromycin	GER-011	33.7	8012.9		30.2	-3.5	0.900644	0.165077	81.6712	2025-01-17	10	6.8905	4.60924	Visible fungal growth around one seed			2	5.418	2.424	2.862	1.641	4.267	0.993	3.747	1.943	2.933
	12	2025-01-15	2025-01-22	Azithromycin	GER-012	27.9	8014.1		26.3	-1.6	0.894424	0.134729	84.9367	2025-01-17	8	5.46962	3.20714	Some micelles around the seeds that didn't germinate			3	5.956	10.683	2.625	6.335	8.838	9.691	3.591	2.476	2.234
	13	2025-01-15	2025-01-22	Control	GER-013	29	7815.9		23.5	-5.5	No pharms	No pharms	No pharms	2025-01-17	9	6.10122	3.47927	Minimal fungal growth, some small micelles			4	2.698	0.441	2.207	10.265	4.438	2.41	2.634	6.146	3.011
	14	2025-01-15	2025-01-22	Control	GER-014	28.3	7560		23.6	-4.7	No pharms	No pharms	No pharms	2025-01-17	8	4.38837	2.2547	Visible fungal growth			5	8.463	5.329	11.334	4.788	3.798	7.899	2.481	1.985	8.767
	15	2025-01-15	2025-01-22	Control	GER-015	26.6	7953.1		26.4	-0.2	No pharms	No pharms	No pharms	2025-01-17	9	6.26833	4.42059	Visible fungal growth			6	3.081	12.707	8.275	3.719	5.004	8.122	6.875	5.154	8.977
	16	2025-01-15	2025-01-22	Ciprofloxacin	GER-016	27.6	8012.1		26.5	-1.1	1.06635	0.190642	82.1219	2025-01-17	7	3.63471	1.57616	Visible fungal growth			7	7.612	5.997	4.778	2.817	3.464	1.576	2.223	0.907	6.063
	17	2025-01-15	2025-01-22	Ciprofloxacin	GER-017	31.2	8007.6		29.7	-1.5	1.23303	0.16749	86.4164	2025-01-17	10	3.1734	2.50296	Minimal fungal growth, some small micelles			8	3.832	3.311	7.152	5.718	0.632	4.555		0.754	0.842
	18	2025-01-15	2025-01-22	Ciprofloxacin	GER-018	30.3	7800.8		24.6	-5.7	1.2183	0.349862	71.2828	2025-01-17	9	4.64322	2.82441	Minimal fungal growth, some small micelles			9	6.641	4.766		12.427		14.683		4.083	4.236
	19	2025-01-15	2025-01-22	Azithromycin	CNT-001	No seeds	No seeds		No seeds	No seeds	0.889193	0.161998	81.7815	No seeds	No seeds	No seeds	No seeds	No visible fungal growth	The filter paper in the Petri dishes apparently adsorb the most of the pharms in the medium		10		14.459						0.502
	20	2025-01-15	2025-01-22	Azithromycin	CNT-002	No seeds	No seeds		No seeds	No seeds	0.900644	0.104725	88.3722	No seeds	No seeds	No seeds	No seeds	No visible fungal growth			Mean	5.56422	6.8905	5.46962	6.10122	4.38837	6.26833	3.63471	3.1734	4.64322
	21	2025-01-15	2025-01-22	Azithromycin	CNT-003	No seeds	No seeds		No seeds	No seeds	0.894424	0.199315	77.7158	No seeds	No seeds	No seeds	No seeds	No visible fungal growth			SD	1.99917	4.60924	3.20714	3.47927	2.2547	4.42059	1.57616	2.50296	2.82441
	22	2025-01-15	2025-01-22	Ciprofloxacin	CNT-004	No seeds	No seeds		No seeds	No seeds	1.06635	0.501599	52.961	No seeds	No seeds	No seeds	No seeds	No visible fungal growth
	23	2025-01-15	2025-01-22	Ciprofloxacin	CNT-005	No seeds	No seeds		No seeds	No seeds	1.23303	0.504668	59.0709	No seeds	No seeds	No seeds	No seeds	No visible fungal growth
	24	2025-01-15	2025-01-22	Ciprofloxacin	CNT-006	No seeds	No seeds		No seeds	No seeds	1.2183	0.460703	62.1848	No seeds	No seeds	No seeds	No seeds	No visible fungal growth
																						Petri dish
	Petri dish	Initial	Final	Pharm	Name	mInitial (mg)	mBeaker (mg)	mWet (mg)	mDry (mg)	mfDry-mi (mg)	CInitial (mg/L)	Cfinal (mg/L)	% Sorption	Start of germination	Germinated seeds	Avareage Length (cm)	Lenght SD (cm)	Fungal growth			No.	1	2	3	4	5	6	7	8	9
	1	2025-01-31	2025-02-07	Oxytetracycline	GER-001	38	8122.5	639.2	30.4	-7.6	0.921623	0.78083	15.2766	2025-02-03	8	5.37288	4.48428	Some fungal growth around the seeds	There are presence of secondary roots		1	2.115	6.05	8.878	6.009	13.382	7	2.873	1.636	17.169
	2	2025-01-31	2025-02-07	Oxytetracycline	GER-002	34.8	7697.8	664.9	28.6	-6.2	0.983563	0.868726	11.6756	2025-02-03	9	6.94411	2.41756	No visible fungal growth			2	7.438	10.036	15.956	4.772	5.913	16.105	1.383	5.804	13.096
	3	2025-01-31	2025-02-07	Oxytetracycline	GER-003	41.2	8220.3	699.2	32.6	-8.6	1.1354	0.832042	26.7179	2025-02-03	9	9.686	5.13539	No visible fungal growth			3	12.217	9.804	15.595	9.136	6.808	12.211	6.084	8.252	2.264
	4	2025-01-31	2025-02-07	Trimethoprim	GER-004	34.1	8151.2	587.6	29.6	-4.5	0.908044	0.694831	23.4805	2025-02-03	6	9.2965	3.80441	There is cloudy water	There are presence of secondary roots		4	0.837	9.079	9.547	15.161	4.505	0.822	1.866	2.974	9.579
	5	2025-01-31	2025-02-07	Trimethoprim	GER-005	32.7	8182.6	524.5	27.7	-5	0.915719	0.662922	27.6064	2025-02-03	7	5.55286	3.98554	Some fungal growth around the seeds			5	8.272	4.983	8.753	11.842	3.573	7.516	10.126	6.331	6.921
	6	2025-01-31	2025-02-07	Trimethoprim	GER-006	33.8	8275	630.3	29.3	-4.5	0.891216	0.740582	16.9021	2025-02-03	7	8.10629	5.48912	No visible fungal growth			6	2.261	4.238	14.249	8.859	4.175	2.048	11.564	7.452	12.028
	7	2025-01-31	2025-02-07	Control	GER-007	37	7901.3	681.5	29.8	-7.2	No pharms	No pharms	No pharms	2025-02-03	8	5.69562	3.76627	Fungal growth around the seeds, the water was turbid			7	9.392	8.049	4.371		0.514	11.042	7.214		0.93
	8	2025-01-31	2025-02-07	Control	GER-008	33.3	8008.4	378.6	26.3	-7	No pharms	No pharms	No pharms	2025-02-03	6	5.40817	2.58563	alrededor de las semillas			8	0.451	3.599	9.416				4.455
	9	2025-01-31	2025-02-07	Control	GER-009	31.2	8026.2	413	27.5	-3.7	No pharms	No pharms	No pharms	2025-02-03	7	8.85529	5.88342	No visible fungal growth			9		6.659	0.409
	10	2025-01-31	2025-02-07	Oxytetracycline	GER-019	No seeds	No seeds	No seeds	No seeds	No seeds	0.921623	0.438624	52.4075	No seeds	No seeds	No seeds	No seeds	No visible fungal growth	The filter paper in the Petri dishes apparently adsorb the most of the pharms in the medium		10
	11	2025-01-31	2025-02-07	Oxytetracycline	GER-020	No seeds	No seeds	No seeds	No seeds	No seeds	0.983563	0.537339	45.3681	No seeds	No seeds	No seeds	No seeds	No visible fungal growth			Mean	5.37288	6.94411	9.686	9.2965	5.55286	8.10629	5.69562	5.40817	8.85529
	12	2025-01-31	2025-02-07	Oxytetracycline	GER-021	No seeds	No seeds	No seeds	No seeds	No seeds	1.1354	0.584621	48.5096	No seeds	No seeds	No seeds	No seeds	No visible fungal growth			SD	4.48428	2.41756	5.13539	3.80441	3.98554	5.48912	3.76627	2.58563	5.88342
	13	2025-01-31	2025-02-07	Trimethoprim	GER-022	No seeds	No seeds	No seeds	No seeds	No seeds	0.908044	0.754356	16.9252	No seeds	No seeds	No seeds	No seeds	No visible fungal growth
	14	2025-01-31	2025-02-07	Trimethoprim	GER-023	No seeds	No seeds	No seeds	No seeds	No seeds	0.915719	0.659977	27.928	No seeds	No seeds	No seeds	No seeds	No visible fungal growth
	15	2025-01-31	2025-02-07	Trimethoprim	GER-024	No seeds	No seeds	No seeds	No seeds	No seeds	0.891216	0.754279	15.3652	No seeds	No seeds	No seeds	No seeds	No visible fungal growth

## Sheet: Carnation 
	Seedling emergence test
																						Petri dish
	Petri dish	Initial	Final	Pharm	Name	mInitial (mg)	mBeaker (mg)	mWet (mg)	mDry (mg)	mfDry-mi (mg)	CInitial (mg/L)	Cfinal (mg/L)	% Sorption	Start of germination	Germinated seeds	Avareage Length (cm)	Lenght SD (cm)	Fungal growth	Observations		No.	10	11	12	13	14	15	16	17	18
	10	2025-01-23	2025-01-30	Oxytetracycline	GER-001	22.1	8375.4	259.8	20.8	-1.3	0.978142	0.681821	30.2943	2025-01-28	9	0.515875	0.266201	Minimal fungal growth	In the Petri dishes with TRM the color of the radicals turn on green		1	0.265	0.492	0.906	1.422	2.796	2.008	0.568	0.781	0.924
	11	2025-01-23	2025-01-30	Oxytetracycline	GER-002	21.6	8274.4	177.4	21.4	-0.2	0.912174	0.597628	34.4831	2025-01-28	8	0.5525	0.3902	Fungal growth around seeds			2	0.571	1.009	1.28	0.814	1.668	1.096	0.583	0.298	0.216
	12	2025-01-23	2025-01-30	Oxytetracycline	GER-003	16.6	8122.7	190.5	15.1	-1.5	0.901297	0.600915	33.3277	2025-01-28	7	0.685286	0.384041	Fungal growth around seeds			3	0.713	0.36	0.675	0.762	0.77	0.51	0.656	0.614	0.762
	13	2025-01-23	2025-01-30	Trimethoprim	GER-004	17.8	7986.9	196.4	17.4	-0.4	0.91571	0.799913	12.6456	2025-01-27	8	0.623625	0.39481	Minimal fungal growth			4	0.594	0.416	0.926	0.524	2.35	0.14	1.413	0.88	0.39
	14	2025-01-23	2025-01-30	Trimethoprim	GER-005	20.4	7898.8	204.1	14.4	-6	0.93794	0.854458	8.9006	2025-01-27	9	1.07511	0.96208	Minimal fungal growth			5	0.196	0.44	0.534	0.107	0.227	1.175	0.213	0.614	0.316
	15	2025-01-23	2025-01-30	Trimethoprim	GER-006	19.2	8056.8	203.6	17.5	-1.7	0.937699	0.732566	21.8762	2025-01-27	8	0.845125	0.727288	Minimal fungal growth			6	0.3	0.264	0.265	0.405	0.528	1.578	0.432	0.131	0.351
	16	2025-01-23	2025-01-30	Control	GER-007	18.2	7736.6	210.9	16.7	-1.5	No pharms	No pharms	No pharms	2025-01-28	9	0.520444	0.378992	No visible fungal growth			7	0.487	0.151	0.211	0.353	0.459	0.144	0.434
	17	2025-01-23	2025-01-30	Control	GER-008	18.2	8629.6	157.1	15.3	-2.9	No pharms	No pharms	No pharms	2025-01-28	6	0.553	0.286169	Fungal growth around seeds			8	1.001	1.288		0.602	0.151	0.11	0.231
	18	2025-01-23	2025-01-30	Control	GER-009	20.1	7827	139.5	17.8	-2.3	No pharms	No pharms	No pharms	2025-01-28	6	0.493167	0.281763	Minimal fungal growth			9					0.727		0.154
	19	2025-01-23	2025-01-30	Oxytetracycline	CNT-001	No seeds	No seeds	No seeds	No seeds	No seeds	0.978142	0.454425	53.542	No seeds	No seeds	No seeds	No seeds	No visible fungal growth			10
	20	2025-01-23	2025-01-30	Oxytetracycline	CNT-002	No seeds	No seeds	No seeds	No seeds	No seeds	0.912174	0.518254	43.1848	No seeds	No seeds	No seeds	No seeds	No visible fungal growth			Mean	0.515875	0.5525	0.685286	0.623625	1.07511	0.845125	0.520444	0.553	0.493167
	21	2025-01-23	2025-01-30	Oxytetracycline	CNT-003	No seeds	No seeds	No seeds	No seeds	No seeds	0.901297	0.455128	49.503	No seeds	No seeds	No seeds	No seeds	No visible fungal growth			SD	0.266201	0.3902	0.384041	0.39481	0.96208	0.727288	0.378992	0.286169	0.281763
	22	2025-01-23	2025-01-30	Trimethoprim	CNT-004	No seeds	No seeds	No seeds	No seeds	No seeds	0.91571	0.887551	3.07505	No seeds	No seeds	No seeds	No seeds	No visible fungal growth
	23	2025-01-23	2025-01-30	Trimethoprim	CNT-005	No seeds	No seeds	No seeds	No seeds	No seeds	0.93794	0.858261	8.49514	No seeds	No seeds	No seeds	No seeds	No visible fungal growth
	24	2025-01-23	2025-01-30	Trimethoprim	CNT-006	No seeds	No seeds	No seeds	No seeds	No seeds	0.937699	0.859316	8.35902	No seeds	No seeds	No seeds	No seeds	No visible fungal growth
																						Petri dish
	Petri dish	Initial	Final	Pharm	Name	mInitial (mg)	mBeaker (mg)	mWet (mg)	mDry (mg)	mfDry-mi (mg)	CInitial (mg/L)	Cfinal (mg/L)	% Sorption	Start of germination	Germinated seeds	Avareage Length (cm)	Lenght SD (cm)	Fungal growth	Observations		No.	10	11	12	13	14	15	16	17	18
	10	2025-02-07	2025-02-14	Azitrhomycin	GER-010	18.9	7898.8	171.7	16.5	-2.4	0.996088	0.537618	46.027	2025-02-13	4	0.57275	0.411225	Some turbidity in the water			1	0.434	0.264	0.525	0.451	0.644	0.239	0.243	0.387	0.36
	11	2025-02-07	2025-02-14	Azitrhomycin	GER-011	18.9	8080.1	153.7	15.7	-3.2	1.11095	0.405164	63.5299	2025-02-13	6	0.474167	0.334783	No visible fungal growth			2	0.099	0.192	0.489	0.38	0.442	0.259	0.117	0.675	0.381
	12	2025-02-07	2025-02-14	Azitrhomycin	GER-012	19.3	8008.3	152.2	17.2	-2.1	1.00489	0.412475	58.9534	2025-02-13	4	0.3875	0.157407	No visible fungal growth			3	0.684	1.102	0.177	0.511	1.031	0.48	1.849	0.346	0.166
	13	2025-02-07	2025-02-14	Ciprofloxacin	GER-013	19.4	7697.8	187.6	18.9	-0.5	0.974323	0.264183	72.8855	2025-02-12	8	0.47	0.160602	Some micelles around the seeds			4	1.074	0.328	0.359	0.832	0.411	0.203	0.2	0.333	1.973
	14	2025-02-07	2025-02-14	Ciprofloxacin	GER-014	18.4	7901.3	217.2	16.8	-1.6	0.949493	0.448851	52.7273	2025-02-12	9	0.751556	0.686523	Some turbidity in the water			5		0.582		0.32	1.067	0.243	0.224	0.352	0.566
	15	2025-02-07	2025-02-14	Ciprofloxacin	GER-015	19.8	8276.5	156.4	17.4	-2.4	0.902676	0.445884	50.6042	2025-02-12	7	0.276857	0.0975849	Some micelles around the seeds			6		0.377		0.491	0.257	0.199		0.162	0.3
	16	2025-02-07	2025-02-14	Control	GER-016	17.3	8326.7	143.5	14.9	-2.4	No pharms	No pharms	No pharms	2025-02-12	5	0.5266	0.740807				7				0.425	2.374	0.315		0.502	0.249
	17	2025-02-07	2025-02-14	Control	GER-017	16.8	7967.1	198.7	15.4	-1.4	No pharms	No pharms	No pharms	2025-02-12	7	0.393857	0.159315				8				0.35	0.385				0.205
	18	2025-02-07	2025-02-14	Control	GER-018	20.8	8037.8	237	15.9	-4.9	No pharms	No pharms	No pharms	2025-02-12	8	0.525	0.598143				9					0.153
	19	2025-02-07	2025-02-14	Azitrhomycin	CNT-001	No seeds	No seeds	No seeds	No seeds	No seeds	0.996088	0.588404	40.9286	No seeds	No seeds	No seeds	No seeds				10
	20	2025-02-07	2025-02-14	Azitrhomycin	CNT-002	No seeds	No seeds	No seeds	No seeds	No seeds	1.11095	0.418335	62.3443	No seeds	No seeds	No seeds	No seeds				Mean	0.57275	0.474167	0.3875	0.47	0.751556	0.276857	0.5266	0.393857	0.525
	21	2025-02-07	2025-02-14	Azitrhomycin	CNT-003	No seeds	No seeds	No seeds	No seeds	No seeds	1.00489	0.593072	40.9817	No seeds	No seeds	No seeds	No seeds				SD	0.411225	0.334783	0.157407	0.160602	0.686523	0.0975849	0.740807	0.159315	0.598143
	22	2025-02-07	2025-02-14	Ciprofloxacin	CNT-004	No seeds	No seeds	No seeds	No seeds	No seeds	0.974323	0.479736	50.7621	No seeds	No seeds	No seeds	No seeds
	23	2025-02-07	2025-02-14	Ciprofloxacin	CNT-005	No seeds	No seeds	No seeds	No seeds	No seeds	0.949493	0.456265	51.9465	No seeds	No seeds	No seeds	No seeds
	24	2025-02-07	2025-02-14	Ciprofloxacin	CNT-006	No seeds	No seeds	No seeds	No seeds	No seeds	0.902676	0.491025	45.6033	No seeds	No seeds	No seeds	No seeds

## Sheet: Alfalfa 
	Seedling emergence test
																						Petri dish
	Petri dish	Initial	Final	Pharm	Name	mInitial (mg)	mBeaker (mg)	mWet (mg)	mDry (mg)	mfDry-mi (mg)	CInitial (mg/L)	Cfinal (mg/L)	% Sorption	Start of germination	Germinated seeds	Avareage Length (cm)	Lenght SD (cm)	Fungal growth	Observations		No.	10	11	12	13	14	15	16	17	18
	10	2025-01-31	2025-02-07	Oxytetracycline	GER-001	27.8	7972.4	700.5	21.5	-6.3	0.921623	0.902122	2.11588	2025-02-01	10	4.1713	2.23504	No visible fungal growth	There wasn't presence of secondary roots		1	4.468	7.731	5.795	1.934	4.959	6.112	0.843	0.694	1.189
	11	2025-01-31	2025-02-07	Oxytetracycline	GER-002	27.4	8138	516.8	20.6	-6.8	0.983563	0.851719	13.4047	2025-02-01	10	3.9444	2.53627	No visible fungal growth			2	2.547	0.747	0.854	4.145	7.086	1.165	0.742	4.074	6.709
	12	2025-01-31	2025-02-07	Oxytetracycline	GER-003	28.6	8292.6	526.9	21.1	-7.5	1.1354	0.943165	16.9308	2025-02-01	10	3.6739	2.16268	No visible fungal growth			3	3.636	6.715	6.124	7.168	5.256	3.642	8.448	0.736	0.841
	13	2025-01-31	2025-02-07	Trimethoprim	GER-004	28.6	7824.1	505.4	20.8	-7.8	0.908044	0.768833	15.3308	2025-02-01	9	4.362	3.41849	No visible fungal growth			4	7.102	4.421	3.995	7.381	2.206	3.377	2.042	7.094	5.781
	14	2025-01-31	2025-02-07	Trimethoprim	GER-005	25.7	7943.4	475.5	18.9	-6.8	0.915719	0.797347	12.9267	2025-02-01	10	3.3322	3.12704	No visible fungal growth			5	6.443	2.438	2.564	0.723	0.686	1.759	1.02	1.91	0.868
	15	2025-01-31	2025-02-07	Trimethoprim	GER-006	27.6	8012.3	484.4	20.7	-6.9	0.891216	0.786131	11.7912	2025-02-01	9	3.35667	1.70995	No visible fungal growth			6	0.763	0.591	0.611	0.61	0.949	2.1	0.724	2.31	0.826
	16	2025-01-31	2025-02-07	Control	GER-007	27.5	8410.7	342.8	17.3	-10.2	No pharms	No pharms	No pharms	2025-02-01	10	2.6656	3.13032	No visible fungal growth			7	0.753	3.81	3.795	0.803	9.361	3.016	8.579	3.096	0.934
	17	2025-01-31	2025-02-07	Control	GER-008	24.4	7802.1	351.4	18.1	-6.3	No pharms	No pharms	No pharms	2025-02-01	9	3.49789	3.45488	No visible fungal growth			8	6.018	3.799	3.644	7.808	0.78	5.927	0.937	10.892	0.605
	18	2025-01-31	2025-02-07	Control	GER-009	25	8111.9	303.7	14.5	-10.5	No pharms	No pharms	No pharms	2025-02-01	9	2.07633	2.37954	A little of turbidity in water			9	4.728	2.248	2.345	8.686	1.192	3.112	0.994	0.675	0.934
	19	2025-01-31	2025-02-07	Oxytetracycline	CNT-001	No seeds	No seeds	No seeds	No seeds	No seeds	0.921623	0.438624	52.4075	No seeds	No seeds	No seeds	No seeds	No visible fungal growth			10	5.255	6.944	7.012		0.847		2.327
	20	2025-01-31	2025-02-07	Oxytetracycline	CNT-002	No seeds	No seeds	No seeds	No seeds	No seeds	0.983563	0.537339	45.3681	No seeds	No seeds	No seeds	No seeds	No visible fungal growth			Mean	4.1713	3.9444	3.6739	4.362	3.3322	3.35667	2.6656	3.49789	2.07633
	21	2025-01-31	2025-02-07	Oxytetracycline	CNT-003	No seeds	No seeds	No seeds	No seeds	No seeds	1.1354	0.584621	48.5096	No seeds	No seeds	No seeds	No seeds	No visible fungal growth			SD	2.23504	2.53627	2.16268	3.41849	3.12704	1.70995	3.13032	3.45488	2.37954
	22	2025-01-31	2025-02-07	Trimethoprim	CNT-004	No seeds	No seeds	No seeds	No seeds	No seeds	0.908044	0.754356	16.9252	No seeds	No seeds	No seeds	No seeds	No visible fungal growth
	23	2025-01-31	2025-02-07	Trimethoprim	CNT-005	No seeds	No seeds	No seeds	No seeds	No seeds	0.915719	0.659977	27.928	No seeds	No seeds	No seeds	No seeds	No visible fungal growth
	24	2025-01-31	2025-02-07	Trimethoprim	CNT-006	No seeds	No seeds	No seeds	No seeds	No seeds	0.891216	0.754279	15.3652	No seeds	No seeds	No seeds	No seeds	No visible fungal growth
																						Petri dish
	Petri dish	Initial	Final	Pharm	Name	mInitial (mg)	mBeaker (mg)	mWet (mg)	mDry (mg)	mfDry-mi (mg)	CInitial (mg/L)	Cfinal (mg/L)	% Sorption	Start of germination	Germinated seeds	Avareage Length (cm)	Lenght SD (cm)	Fungal growth	Observations		No.	1	2	3	4	5	6	7	8	9
	1	2025-02-07	2025-02-14	Azitrhomycin	GER-001	22.8	8011.9	274.1	16.4	-6.4	0.996088	0.492123	50.5945	2025-02-08	8	3.6735	3.10915	No presence of visible fungal grotwh			1	1.227	1.341	0.638	7.55	8.358	1.88	0.787	1.355	1.24
	2	2025-02-07	2025-02-14	Azitrhomycin	GER-002	24.8	7972.4	252.7	17.8	-7	1.11095	0.441066	60.2983	2025-02-08	6	1.70017	1.95335	A little of turbidity in water			2	2.49	0.753	0.953	2.455	4.967	0.917	0.732	1.048	0.908
	3	2025-02-07	2025-02-14	Azitrhomycin	GER-003	27.6	8220.1	315.2	16.3	-11.3	1.00489	0.38758	61.4308	2025-02-08	7	1.76243	2.13656	Poor root growth, fungus in mycelium around the seed			3	7.18	0.885	1.204	1.686	1.459	2.101	1.839	0.698	4.738
	4	2025-02-07	2025-02-14	Ciprofloxacin	GER-004	27.1	8122.4	404	20.3	-6.8	0.974323	0.425878	56.2899	2025-02-08	7	4.22843	2.59234	A little of turbidity in water			4	1.798	5.66	1.23	4.536	6.709	0.922	0.591	0.78	0.881
	5	2025-02-07	2025-02-14	Ciprofloxacin	GER-005	28.5	7714.3	287.8	19.8	-8.7	0.949493	0.567054	40.2782	2025-02-08	7	3.45457	3.1915	A little of turbidity in water			5	5.838	0.874	6.584	3.789	1.394	6.524	0.441	1.095	0.98
	6	2025-02-07	2025-02-14	Ciprofloxacin	GER-006	26.2	8112	313.1	17.4	-8.8	0.902676	0.3193	64.6273	2025-02-08	8	2.67163	2.8101	Presence of a big mycelium			6	0.836	0.688	0.943	1.729	0.967	7.687	3.573	0.828	1.054
	7	2025-02-07	2025-02-14	Control	GER-007	26.2	8376.1	276.2	18.8	-7.4	No pharms	No pharms	No pharms	2025-02-08	8	1.15125	1.07168	The water was cloudy			7	1.257		0.785	7.854	0.328	0.975	0.718	1.04	1.075
	8	2025-02-07	2025-02-14	Control	GER-008	28.8	8274.9	354.6	18.8	-10	No pharms	No pharms	No pharms	2025-02-08	10	1.0202	0.283085	A little of turbidity in water			8	8.762					0.367	0.529	0.801	1.253
	9	2025-02-07	2025-02-14	Control	GER-009	26	8151.1	334.5	17.5	-8.5	No pharms	No pharms	No pharms	2025-02-08	10	1.5343	1.15956	No presence of visible fungal grotwh			9								1.612	1.823
	19	2025-02-07	2025-02-14	Azitrhomycin	CNT-001	No seeds	No seeds	No seeds	No seeds	No seeds	0.996088	0.588404	40.9286	No seeds	No seeds	No seeds	No seeds	No visible fungal growth			10								0.945	1.391
	20	2025-02-07	2025-02-14	Azitrhomycin	CNT-002	No seeds	No seeds	No seeds	No seeds	No seeds	1.11095	0.418335	62.3443	No seeds	No seeds	No seeds	No seeds	No visible fungal growth			Mean	3.6735	1.70017	1.76243	4.22843	3.45457	2.67163	1.15125	1.0202	1.5343
	21	2025-02-07	2025-02-14	Azitrhomycin	CNT-003	No seeds	No seeds	No seeds	No seeds	No seeds	1.00489	0.593072	40.9817	No seeds	No seeds	No seeds	No seeds	No visible fungal growth			SD	3.10915	1.95335	2.13656	2.59234	3.1915	2.8101	1.07168	0.283085	1.15956
	22	2025-02-07	2025-02-14	Ciprofloxacin	CNT-004	No seeds	No seeds	No seeds	No seeds	No seeds	0.974323	0.479736	50.7621	No seeds	No seeds	No seeds	No seeds	No visible fungal growth
	23	2025-02-07	2025-02-14	Ciprofloxacin	CNT-005	No seeds	No seeds	No seeds	No seeds	No seeds	0.949493	0.456265	51.9465	No seeds	No seeds	No seeds	No seeds	No visible fungal growth
	24	2025-02-07	2025-02-14	Ciprofloxacin	CNT-006	No seeds	No seeds	No seeds	No seeds	No seeds	0.902676	0.491025	45.6033	No seeds	No seeds	No seeds	No seeds	No visible fungal growth
