# Supplementary material
Source: Royal Society of Chemistry journal article supplement (doi:10.1039/d6em00053c)
Supplement: d6em00053c4.xlsx [file d6em00053c4.xlsx]

## Sheet: Enrofloxacin_G
Seedling germination
Start date:	2024-05-16
Antibiotic:	Enrofloxacin
Actual concentration:	0.9982 mg/L
Seed Species	Seed ID	Quantity	Container weight, g	Container + seeds weight, g	Container + wet seeds weight, g	Container + dried seeds weight, after drying at 50 °C, g	mi (mg)	mfdry	Mass change following 7 days incubation at 18 °C	Average mass change following incubation	Mass change following drying at 50 °C	Average mass change following drying	Date of first seedling emergence	Total seeds germinated	Average radicle length, mm	Minimum radicle length, mm	Maximum radicle length, mm	Comments
			W1	W2	W3	W4	W2-W1	W4-W1	W5 = (W3 - W2)	W5 / Quantity	W6 = (W4 - W3)	W6 / Quantity	(dd/mm/yyyy)
Fabaceae	French Bean	30	2.2557	7.2204	17.5813	5.8599	4.9647	3.6042	10.3609	0.345363	-11.7214	-0.390713	2024-05-17	17	0	0	0
	Pea	30	2.2816	7.5014	18.6746	6.7808	5.2198	4.4992	11.1732	0.37244	-11.8938	-0.39646	2024-05-20	19	0	0	0
	White Clover	30	0.4068	0.4274	0.6746	0.4219	0.0206	0.0151	0.2472	0.00824	-0.2527	-0.00842333	2024-05-17	27	0	0	0
	Red Clover	30	0.4062	0.4484	0.6215	0.4392	0.0422	0.033	0.1731	0.00577	-0.1823	-0.00607667	2024-05-17	12	0	0	0
Poaceae	Oats (Conway)	30	2.2563	3.4035	5.0333	3.3099	1.1472	1.0536	1.6298	0.0543267	-1.7234	-0.0574467	2024-05-17	4	0	0	0
	Wheat (Claire)	30	2.2362	3.0781	6.3657	2.8737	0.8419	0.6375	3.2876	0.109587	-3.492	-0.1164	2024-05-17	29	0	0	0
	Barley	30	2.2516	3.2049	9.6272	2.9661	0.9533	0.7145	6.4223	0.214077	-6.6611	-0.222037	2024-05-17	29	0	0	0
	Sheeps Fescue	30	0.4069	0.4292	0.4455	0.4267	0.0223	0.0198	0.0163	0.000543333	-0.0188	-0.000626667	2024-05-23	1	0	0	0
	Red Fescue	30	0.4026	0.4264	0.522	0.4211	0.0238	0.0185	0.0956	0.00318667	-0.1009	-0.00336333	2024-05-20	25	0	0	0
	Quaking Grass	30	0.4021	0.4615	0.4672	0.4146	0.0594	0.0125	0.0057	0.00019	-0.0526	-0.00175333	2024-05-21	1	0	0	0
Asteracea	Sunflower	30	2.2439	2.8267	4.6606	2.7897	0.5828	0.5458	1.8339	0.06113	-1.8709	-0.0623633	2024-05-17	21	0	0	0
	Cos Lettuce	30	0.4061	0.4364	1.0761	0.4306	0.0303	0.0245	0.6397	0.0213233	-0.6455	-0.0215167	2024-05-16	25	0	0	0
	Chicory	30	0.4062	0.4476	0.4985	0.4436	0.0414	0.0374	0.0509	0.00169667	-0.0549	-0.00183	2024-05-20	6	0	0	0
	Oxeye Daisy	30	0.408	0.4224	0.4733	0.4211	0.0144	0.0131	0.0509	0.00169667	-0.0522	-0.00174	2024-05-20	4	0	0	0
	Black Knapweed	30	0.4058	0.4929	0.5729	0.4876	0.0871	0.0818	0.08	0.00266667	-0.0853	-0.00284333	2024-05-21	2	0	0	0
	Cornflower	30	2.2883	2.4177	3.9574	2.4125	0.1294	0.1242	1.5397	0.0513233	-1.5449	-0.0514967	2024-05-17	29	0	0	0
						Δm (mf-mi)	mf
					French Bean	-1.3605	3.6042
					Pea	-0.7206	4.4992
					White Clover	-0.0055	0.0151
					Red Clover	-0.0092	0.033
					Oats (Conway)	-0.0936	1.0536
					Wheat (Claire)	-0.2044	0.6375
					Barley	-0.2388	0.7145
					Sheeps Fescue	-0.0025	0.0198
					Red Fescue	-0.0053	0.0185
					Quaking Grass	-0.0469	0.0125
					Sunflower	-0.037	0.5458
					Cos Lettuce	-0.0058	0.0245
					Chicory	-0.004	0.0374
					Oxeye Daisy	-0.0013	0.0131
					Black Knapweed	-0.0053	0.0818
					Cornflower	-0.0052	0.1242

## Sheet: Enrofloxacin_RL
Radicle measurements
Antibiotic:	Enrofloxacin
	Fabaceae species				Poaceae species						Asteracea species
Measurement N°, mm	French bean	Pea	White clover	Red clover	Oats (Conway)	Wheat (Claire)	Barley	Sheep's fescue	Red fescue	Quaking grass	Sunflower	Cos lettuce	Chicory	Oxeye daisy	Black knapweed	Cornflower
Average	37.567	27.9383	39.0613	37.8326	29.9559	63.6579	74.5782	3.0785	17.6261	6.52028	42.5732	58.1442	4.80613	10.4079	10.8307	90.4933
Minimum	11.0699	10.8402	27.6131	6.77465	5.81999	22.3491	55.3201	3.0785	4.08373	6.52028	10.6989	32.5431	2.05779	3.79463	6.89427	39.0502
Maximum	79.3293	59.085	50.0953	55.5402	52.8199	80.4598	92.6006	3.0785	27.2352	6.52028	87.2714	81.3588	8.70048	23.1185	14.7672	165.105
1	69.2474	22.7975	28.3406	52.729	48.0686	65.9896	69.4619	3.0785	18.9121	6.52028	51.1645	74.181	6.29486	3.79463	6.89427	95.2863
2	26.9879	13.0351	50.0953	53.9915	52.8199	56.7834	83.3742		4.60342		37.39	39.4754	5.08703	23.1185	14.7672	70.9432
3	29.5797	15.6162	45.8426	31.5251	5.81999	62.4369	73.6512		18.002		59.0372	81.3588	3.02373	7.40602		129.426
4	54.4523	33.5364	43.9689	40.4041	13.1152	60.9635	92.6006		16.3069		46.7313	48.6646	3.67287	7.31254		81.169
5	69.4991	23.4219	42.4975	55.5402		62.1167	71.2151		10.543		32.4196	64.9347	8.70048			111.146
6	26.9381	25.7682	35.5996	22.8578		72.6518	82.3575		21.8687		45.4102	35.2822	2.05779			41.3774
7	16.5783	51.6216	46.0671	29.0534		40.2406	58.5295		20.5894		66.0803	34.4662				95.4399
8	30.2978	24.4346	27.6131	46.9018		78.5896	79.2067		16.5623		38.7378	76.3638				76.4769
9	25.1398	39.3074	37.3102	28.6776		72.5398	80.7944		4.08373		10.6989	67.9875				83.5793
10	44.1194	13.7188	43.4976	6.77465		80.4598	71.886		25.8618		62.9521	66.3517				95.5854
11	12.1855	19.4876	37.8224	51.408		68.059	79.4381		22.014		58.6189	56.3698				122.228
12	11.0699	33.6248	31.3113	34.1278		70.4222	62.2188		21.701		87.2714	73.7836				87.0691
13	53.8051	29.3442	36.8272			68.0756	63.4738		17.7207		41.5379	62.4808				57.6511
14	42.3704	10.8402	43.2829			76.9166	80.9657		12.8844		30.3261	58.3375				90.154
15	27.8376	20.4358	44.7185			36.4405	81.8646		10.309		34.8426	32.8391				96.2871
16	79.3293	59.085	46.61			49.6959	55.3201		17.7234		11.3116	45.2612				80.4497
17	19.202	41.7077	48.0765			70.8591	75.492		25.6322		46.1251	68.9319				82.145
18		29.8392	44.3522			22.3491	81.1174		17.9816		41.1829	72.7493				125.445
19		23.2046	32.3809			75.6403	68.4692		15.3507		11.6357	69.9654				65.7335
20			30.8852			63.3729	56.9018		20.9236		34.5214	77.2313				116.3
21			39.9279			61.9207	64.06		14.787		46.0426	47.281				93.6503
22			32.1042			74.1992	76.4147		27.2352			57.9496				57.0831
23			38.5556			67.4742	63.9745		21.9407			49.718				91.4988
24			45.5941			61.2978	81.0712		14.2455			59.0977				95.1694
25			35.8109			76.6098	79.8616		22.8692			32.5431				165.105
26			36.6833			73.4755	90.5735									73.7563
27			28.8799			47.0325	72.8742									39.0502
28						59.2867	83.1713									107.302
29						70.1808	82.4278									97.7976
30

## Sheet: Ciprofloxacin_G
Seedling germination
Start date:	2024-05-14
Antibiotic:	Ciprofloxacin
Actual concentration:	1.0018 mg/L
Seed Species	Seed ID	Quantity	Container weight, g	Container + seeds weight, g	Container + wet seeds weight, g	Container + dried seeds weight, after drying at 50 °C, g	mi (mg)	mfdry	Mass change following 7 days incubation at 18 °C	Average mass change following incubation	Mass change following drying at 50 °C	Average mass change following drying	Date of first seedling emergence	Total seeds germinated	Average radicle length, mm	Minimum radicle length, mm	Maximum radicle length, mm	Comments
			W1	W2	W3	W4	W2-W1	W4-W1	W5 = (W3 - W2)	W5 / Quantity	W6 = (W4 - W3)	W6 / Quantity	(dd/mm/yyyy)
Fabaceae	French Bean	30	2.2682	7.1169	15.8319	5.9121	4.8487	3.6439	8.715	0.2905	-9.9198	-0.33066	2024-05-16	11	0	0	0
	Pea	30	2.2704	8.2609	20.5518	7.765	5.9905	5.4946	12.2909	0.409697	-12.7868	-0.426227	2024-05-16	23	0	0	0
	White Clover	30	0.4063	0.4458	0.6461	0.4334	0.0395	0.0271	0.2003	0.00667667	-0.2127	-0.00709	2024-05-14	13	0	0	0
	Red Clover	30	0.4049	0.4269	0.6709	0.4194	0.022	0.0145	0.244	0.00813333	-0.2515	-0.00838333	2024-05-14	25	0	0	0
Poaceae	Oats (Conway)	30	2.2678	3.6771	5.7444	3.5559	1.4093	1.2881	2.0673	0.06891	-2.1885	-0.07295	2024-05-15	6	0	0	0
	Wheat (Claire)	30	2.2666	2.9925	6.4558	2.8217	0.7259	0.5551	3.4633	0.115443	-3.6341	-0.121137	2024-05-14	29	0	0	0
	Barley	30	2.271	3.2252	9.7409	3.0148	0.9542	0.7438	6.5157	0.21719	-6.7261	-0.224203	2024-05-14	28	0	0	0
	Sheeps Fescue	30	0.4061	0.4266	0.4806	0.4253	0.0205	0.0192	0.054	0.0018	-0.0553	-0.00184333	2024-05-15	2	0	0	0
	Red Fescue	30	0.4071	0.4321	0.5439	0.4249	0.025	0.0178	0.1118	0.00372667	-0.119	-0.00396667	2024-05-17	25	0	0	0
	Quaking Grass	30	0.4049	0.4223	0.4877	0.4204	0.0174	0.0155	0.0654	0.00218	-0.0673	-0.00224333	-	0	0	0	0
Asteracea	Sunflower	30	2.253	2.8231	4.8098	2.7852	0.5701	0.5322	1.9867	0.0662233	-2.0246	-0.0674867	2024-05-15	21	0	0	0
	Cos Lettuce	30	0.4031	0.4349	1.0166	0.4296	0.0318	0.0265	0.5817	0.01939	-0.587	-0.0195667	2024-05-15	27	0	0	0
	Chicory	30	0.4037	0.4453	0.4876	0.441	0.0416	0.0373	0.0423	0.00141	-0.0466	-0.00155333	2024-05-21	1	0	0	0
	Oxeye Daisy	30	0.4037	0.4192	0.4903	0.4171	0.0155	0.0134	0.0711	0.00237	-0.0732	-0.00244	2024-05-20	6	0	0	0
	Black Knapweed	30	0.4044	0.4803	0.5534	0.4753	0.0759	0.0709	0.0731	0.00243667	-0.0781	-0.00260333	2024-05-17	1	0	0	0
	Cornflower	30	2.2327	2.3634	3.8677	2.3579	0.1307	0.1252	1.5043	0.0501433	-1.5098	-0.0503267	2024-05-15	29	0	0	0
						Δm (mf-mi)	mf		RCI (%)
					French Bean	-1.2048	3.6439
					Pea	-0.4959	5.4946
					White Clover	-0.0124	0.0271
					Red Clover	-0.0075	0.0145
					Oats (Conway)	-0.1212	1.2881
					Wheat (Claire)	-0.1708	0.5551
					Barley	-0.2104	0.7438
					Sheeps Fescue	-0.0013	0.0192
					Red Fescue	-0.0072	0.0178
					Quaking Grass	-0.0019	0.0155
					Sunflower	-0.0379	0.5322
					Cos Lettuce	-0.0053	0.0265
					Chicory	-0.0043	0.0373
					Oxeye Daisy	-0.0021	0.0134
					Black Knapweed	-0.005	0.0709
					Cornflower	-0.0055	0.1252

## Sheet: Ciprofloxacin_RL
Radicle measurements (mm)
Antibiotic:	Ciprofloxacin
	Fabaceae species				Poaceae species						Asteracea species
Measurement N°, mm	French bean	Pea	White clover	Red clover	Oats (Conway)	Wheat (Claire)	Barley	Sheep's fescue	Red fescue	Quaking grass	Sunflower	Cos lettuce	Chicory	Oxeye daisy	Black knapweed	Cornflower
Average	24.1325	29.4585	44.7232	33.5169	32.1425	58.0569	63.5513	37.6359	19.4804	0	42.8174	48.4383	8.89945	13.454	18.8935	92.365
Minimum	6.18198	7.7867	13.5532	13.1945	9.70416	13.4094	13.3689	5.7954	4.71426	0	3.38274	15.8684	8.89945	5.83237	18.8935	16.1942
Maximum	48.0152	66.9829	57.9273	51.8634	61.4679	79.6934	89.767	69.4764	32.5723	0	107.3	89.8393	8.89945	23.4789	18.8935	157.367
1	34.4444	39.0894	51.1481	34.0614	15.3727	70.3485	79.6771	5.7954	22.3466	0	43.3805	76.1148	8.89945	19.9801	18.8935	86.4479
2	47.7917	50.7232	57.9273	24.3274	61.4679	79.67	62.0095	69.4764	21.0493		48.7821	75.0434		6.78553		106.514
3	18.0945	26.6015	39.6046	30.7242	9.70416	64.6756	51.2917		19.0733		76.1803	69.6521		5.83237		136.839
4	29.2805	21.4518	39.2637	38.4532	47.9056	64.7451	75.7175		14.9773		32.9457	63.679		23.4789		93.6086
5	36.6993	17.5964	33.6388	49.3581	18.3752	66.8967	75.1062		18.4501		30.9426	60.5905		13.1688		72.2962
6	11.3116	18.4288	50.5775	27.746	40.0295	26.521	51.5684		20.2327		36.0539	35.4494		11.4782		150.29
7	6.18198	46.8808	57.5714	39.2345		34.1648	79.9377		22.0505		60.0265	76.2031				113.047
8	13.8408	33.4226	39.3583	41.4978		64.0505	55.9692		32.5723		107.3	16.5823				117.359
9	12.4951	7.7867	13.5532	30.2214		66.2769	62.8311		29.3966		17.4012	17.3347				78.8521
10	7.30194	13.8657	52.8311	28.4158		69.1444	73.4428		14.5939		6.15075	29.6618				104.088
11	48.0152	20.6795	45.7799	13.1945		53.2941	53.0536		16.7721		29.8904	48.0757				37.2831
12		25.9857	50.6969	15.7316		52.265	38.0766		20.8801		85.3312	27.242				107.045
13		31.5743	49.4513	49.6785		71.555	67.5401		8.44028		44.1559	49.8144				120.698
14		53.9056		31.3953		41.948	71.1084		14.1949		3.38274	68.4442				86.1854
15		10.6833		44.588		70.4506	89.767		18.6742		30.555	67.3644				92.2663
16		14.1278		24.5222		72.2104	74.6367		22.4047		19.4879	52.0124				62.0526
17		34.0828		43.3176		58.8353	86.2863		6.54741		64.7805	53.9856				94.2646
18		25.5043		30.2276		66.7801	66.891		4.71426		29.943	31.0037				65.81
19		34.4508		26.9601		58.8349	73.0707		25.5439		8.38294	17.6196				94.7219
20		64.507		29.3012		73.598	70.8861		26.6253		55.0612	50.4686				74.118
21		66.9829		35.1467		76.3138	53.2435		23.579		69.0311	57.4548				113.95
22		9.60635		36.4995		46.0541	74.9023		21.8759			30.2117				93.1605
23		9.60851		31.9844		79.6934	13.3689		21.4339			15.8684				16.1942
24				29.4721		14.345	74.4454		19.9081			26.9954				20.5312
25				51.8634		78.9363	20.0176		20.6731			43.6239				121.671
26						39.2241	62.0564					57.4987				157.367
27						50.8785	47.1634					89.8393				113.734
28						13.4094	75.3722									61.1869
29						58.5311										87.0039
30

## Sheet: Ofloxacin_G
Seedling germination
Start date:		2024-05-22
Antibiotic:		Ofloxacin
Actual concentration:		1.0021 mg/L
Seed Species	Seed ID	Quantity	Container weight, g	Container + seeds weight, g	Container + wet seeds weight, g	Container + dried seeds weight, after drying at 50 °C, g	mi (mg)	mfdry	Mass change following 7 days incubation at 18 °C	Average mass change following incubation	Mass change following drying at 50 °C	Average mass change following drying	Date of first seedling emergence	Total seeds germinated	Average radicle length, mm	Minimum radicle length, mm	Maximum radicle length, mm	Comments
			W1	W2	W3	W4	W2-W1	W4-W1	W5 = (W3 - W2)	W5 / Quantity	W6 = (W4 - W3)	W6 / Quantity	(dd/mm/yyyy)
Fabaceae	French Bean	30	2.2819	7.1317	14.0814	6.0339	4.8498	3.752	6.9497	0.231657	-8.0475	-0.26825	-	0	0	0	0
	Pea	30	2.2311	7.7506	16.2186	6.8277	5.5195	4.5966	8.468	0.282267	-9.3909	-0.31303	2024-05-24	12	0	0	0
	White Clover	30	0.4069	0.4261	0.6461	0.421	0.0192	0.0141	0.22	0.00733333	-0.2251	-0.00750333	2024-05-23	28	0	0	0
	Red Clover	30	0.4075	0.4553	0.7797	0.4424	0.0478	0.0349	0.3244	0.0108133	-0.3373	-0.0112433	2024-05-24	21	0	0	0
Poaceae	Oats (Conway)	30	2.2245	3.5979	6.2415	3.4665	1.3734	1.242	2.6436	0.08812	-2.775	-0.0925	2024-05-24	15	0	0	0
	Wheat (Claire)	30	2.267	3.2596	6.7833	3.0436	0.9926	0.7766	3.5237	0.117457	-3.7397	-0.124657	2024-05-23	30	0	0	0
	Barley	30	2.2678	3.2453	9.4107	3.018	0.9775	0.7502	6.1654	0.205513	-6.3927	-0.21309	2024-05-23	29	0	0	0
	Sheeps Fescue	30	0.4037	0.4261	0.4474	0.4243	0.0224	0.0206	0.0213	0.00071	-0.0231	-0.00077	-	0	0	0	0
	Red Fescue	30	0.4071	0.4318	0.5168	0.4279	0.0247	0.0208	0.085	0.00283333	-0.0889	-0.00296333	2024-05-29	23	0	0	0
	Quaking Grass	30	0.4066	0.429	0.5002	0.4272	0.0224	0.0206	0.0712	0.00237333	-0.073	-0.00243333	2024-05-29	3	0	0	0
Asteracea	Sunflower	30	2.2932	2.903	4.4816	2.8682	0.6098	0.575	1.5786	0.05262	-1.6134	-0.05378	2024-05-24	24	0	0	0
	Cos Lettuce	30	0.4064	0.438	1.0634	0.4333	0.0316	0.0269	0.6254	0.0208467	-0.6301	-0.0210033	2024-05-23	25	0	0	0
	Chicory	30	0.4071	0.4508	0.4772	0.447	0.0437	0.0399	0.0264	0.00088	-0.0302	-0.00100667	-	0	0	0	0
	Oxeye Daisy	30	0.4073	0.4248	0.4851	0.4229	0.0175	0.0156	0.0603	0.00201	-0.0622	-0.00207333	2024-05-29	3	0	0	0
	Black Knapweed	30	0.4047	0.4882	0.5354	0.4801	0.0835	0.0754	0.0472	0.00157333	-0.0553	-0.00184333	-	0	0	0	0
	Cornflower	30	2.2677	2.3938	3.7893	2.3822	0.1261	0.1145	1.3955	0.0465167	-1.4071	-0.0469033	2024-05-23	28	0	0	0
						Δm (mf-mi)	mf
					French Bean	-1.0978	3.752
					Pea	-0.9229	4.5966
					White Clover	-0.0051	0.0141
					Red Clover	-0.0129	0.0349
					Oats (Conway)	-0.1314	1.242
					Wheat (Claire)	-0.216	0.7766
					Barley	-0.2273	0.7502
					Sheeps Fescue	-0.0018	0.0206
					Red Fescue	-0.0039	0.0208
					Quaking Grass	-0.0018	0.0206
					Sunflower	-0.0348	0.575
					Cos Lettuce	-0.0047	0.0269
					Chicory	-0.0038	0.0399
					Oxeye Daisy	-0.0019	0.0156
					Black Knapweed	-0.0081	0.0754
					Cornflower	-0.0116	0.1145

## Sheet: Ofloxacin_RL
Radicle measurements
Antibiotic:	Ofloxacin
	Fabaceae species				Poaceae species						Asteracea species
Measurement N°, mm	French bean	Pea	White clover	Red clover	Oats (Conway)	Wheat (Claire)	Barley	Sheep's fescue	Red fescue	Quaking grass	Sunflower	Cos lettuce	Chicory	Oxeye daisy	Black knapweed	Cornflower
Average	0	16.7341	31.7706	46.1342	35.7709	57.4487	67.6325	0	14.3203	1.50887	29.8417	62.8212	0	12.4892	0	86.7508
Minimum	0	4.15489	5.24886	4.11232	7.67779	5.64456	1.08738	0	3.13614	1.46365	3.65718	26.2591	0	7.33581	0	27.0479
Maximum	0	36.3735	49.5615	70.1846	70.4019	79.0273	91.7182	0	21.8623	1.55494	66.0401	83.8781	0	15.4463	0	124.101
1	0	10.8419	29.3072	17.704	70.4019	73.6929	66.4182	0	12.7334	1.55494	4.91422	63.6748	0	7.33581	0	119.208
2		5.6018	49.5615	54.3079	15.9955	78.3116	69.5018		16.5808	1.50804	9.59753	75.8348		14.6854		94.5037
3		36.3735	41.4411	29.3064	7.67779	62.8349	64.0031		10.5323	1.46365	45.7055	74.9069		15.4463		76.113
4		11.9595	10.0142	58.0885	30.8707	64.5043	69.4926		17.0667		55.1077	64.2311				99.3677
5		4.15489	26.4152	4.11232	7.95098	59.7706	70.4818		21.1185		8.53605	49.0073				116.488
6		30.9709	35.9423	13.3436	65.4618	56.4353	65.3225		17.0363		16.3359	76.0538				50.972
7		20.8514	32.6887	40.4787	49.1861	51.205	63.9251		21.8623		3.65718	81.5072				88.6241
8		19.2874	31.4909	56.9495	42.2964	48.8046	74.626		16.111		5.6994	76.505				86.6102
9		9.26777	46.5704	41.8893	34.399	36.1185	52.1917		7.56108		26.0639	56.7135				61.5483
10		6.00253	37.7507	55.5925	15.3798	55.6208	79.2166		15.4644		4.08655	82.4282				62.948
11		25.8669	21.7849	47.107	61.8952	79.0273	60.0458		13.033		11.4328	64.5971				124.101
12		19.6303	44.5648	53.0938	16.5351	29.5572	68.2035		5.75959		66.0401	65.0177				74.8895
13			30.4298	47.5154	49.831	76.0223	1.08738		21.3496		48.0833	64.5884				94.1391
14			30.3249	70.1846	35.8957	59.5081	69.4102		13.856		33.2207	26.2869				109.781
15			25.853	57.4725	32.7866	55.9382	81.3574		16.3132		35.4001	83.8781				58.7481
16			38.2244	42.3564		71.4005	45.8732		17.1836		37.2815	43.9265				90.7761
17			28.0268	49.2359		56.2537	78.9428		15.9332		10.8142	34.7292				89.8823
18			36.1309	66.3207		36.4979	59.938		7.16087		42.947	65.4876				98.4479
19			26.6038	67.8606		47.5705	79.1246		14.1022		39.1639	26.2591				73.8292
20			40.0259	50.2268		75.0035	85.3525		14.6785		15.8693	66.6212				71.0676
21			32.0373	45.6707		55.053	60.4877		15.5586		41.9028	45.9754				103.044
22			38.9979			63.8764	65.2229		3.13614		52.5333	77.5755				76.6547
23			31.7322			69.3055	62.9927		15.2358		44.5466	65.8458				103.761
24			34.1011			54.7563	91.7182				57.2615	67.3795				27.0479
25			5.24886			68.2586	81.9167					71.4981				115.436
26			22.926			57.1008	52.2392									82.1641
27			19.4719			64.7374	80.7452									79.3098
28			41.9097			46.9772	77.9617									99.5611
29						63.6722	83.5423
30						5.64456

## Sheet: Oxytetracycline_G
Seedling germination
Start date:	2024-06-04
Antibiotic:	Oxtetracycline hydrochloride
Actual concentration:	1.0018 mg/L
Seed Species	Seed ID	Quantity	Container weight, g	Container + seeds weight, g	Container + wet seeds weight, g	Container + dried seeds weight, after drying at 50 °C, g	mi (mg)	mfdry	Mass change following 7 days incubation at 18 °C	Average mass change following incubation	Mass change following drying at 50 °C	Average mass change following drying	Date of first seedling emergence	Total seeds germinated	Average radicle length, mm	Minimum radicle length, mm	Maximum radicle length, mm	Comments
			W1	W2	W3	W4	W2-W1	W4-W1	W5 = (W3 - W2)	W5 / Quantity	W6 = (W4 - W3)	W6 / Quantity	(dd/mm/yyyy)
Fabaceae	French Bean	20	2.2606	5.3787	9.5039	4.6743	3.1181	2.4137	4.1252	0.20626	-4.8296	-0.24148	-	0	0	0	0	20 seeds. 1 petro dish mouldy/cultures
	Pea	30	2.2849	7.9843	17.3631	6.9599	5.6994	4.675	9.3788	0.312627	-10.4032	-0.346773	2024-06-06	12	0	0	0
	White Clover	30	0.4027	0.4248	0.6316	0.4194	0.0221	0.0167	0.2068	0.00689333	-0.2122	-0.00707333	2024-06-05	28	0	0	0
	Red Clover	30	0.4074	0.4607	0.7235	0.4465	0.0533	0.0391	0.2628	0.00876	-0.277	-0.00923333	2024-06-05	22	0	0	0
Poaceae	Oats (Conway)	30	2.2668	3.5728	5.057	3.4549	1.306	1.1881	1.4842	0.0494733	-1.6021	-0.0534033	2024-06-10	4	0	0	0
	Wheat (Claire)	30	2.2893	3.2043	6.4176	2.9684	0.915	0.6791	3.2133	0.10711	-3.4492	-0.114973	2024-06-05	30	0	0	0
	Barley	30	2.2781	3.2074	8.2113	2.963	0.9293	0.6849	5.0039	0.166797	-5.2483	-0.174943	2024-06-06	30	0	0	0
	Sheeps Fescue	30	0.4061	0.4267	0.4367	0.4247	0.0206	0.0186	0.01	0.000333333	-0.012	-0.0004	-	0	0	0	0
	Red Fescue	30	0.4043	0.4289	0.4914	0.4248	0.0246	0.0205	0.0625	0.00208333	-0.0666	-0.00222	2024-06-10	21	0	0	0
	Quaking Grass	30	0.4037	0.4252	0.4889	0.4222	0.0215	0.0185	0.0637	0.00212333	-0.0667	-0.00222333	-	0	0	0	0
Asteracea	Sunflower	30	2.2657	2.8132	4.2125	2.7714	0.5475	0.5057	1.3993	0.0466433	-1.4411	-0.0480367	2024-06-06	26	0	0	0
	Cos Lettuce	30	0.4039	0.4331	0.9156	0.4294	0.0292	0.0255	0.4825	0.0160833	-0.4862	-0.0162067	2024-06-06	28	0	0	0
	Chicory	30	0.4042	0.4456	0.4686	0.4411	0.0414	0.0369	0.023	0.000766667	-0.0275	-0.000916667	2024-06-11	1	0	0	0
	Oxeye Daisy	30	0.4035	0.4174	0.4502	0.4147	0.0139	0.0112	0.0328	0.00109333	-0.0355	-0.00118333	2024-06-10	4	0	0	0
	Black Knapweed	30	0.4048	0.4875	0.5583	0.4812	0.0827	0.0764	0.0708	0.00236	-0.0771	-0.00257	2024-06-10	2	0	0	0
	Cornflower	30	2.2272	2.3526	3.3911	2.3426	0.1254	0.1154	1.0385	0.0346167	-1.0485	-0.03495	2024-06-06	23	0	0	0
Extra	French Bean (b)	10	1.3215	2.7995	5.1578	2.4918			2.3583	0.23583	-2.666	-0.2666	-	0	0	0	0	10 seeds. Added 1 day after rest of the run.
SUM	French bean	30	3.5821	8.1782	14.6617	7.1661	4.5961	3.584	6.4835	0.216117	-7.4956	-0.249853	-	0	0	0	0	Sum total of French Bean data.
						Δm (mf-mi)	mf
					French Bean	-1.0121	3.584
					Pea	-1.0244	4.675
					White Clover	-0.0054	0.0167
					Red Clover	-0.0142	0.0391
					Oats (Conway)	-0.1179	1.1881
					Wheat (Claire)	-0.2359	0.6791
					Barley	-0.2444	0.6849
					Sheeps Fescue	-0.002	0.0186
					Red Fescue	-0.0041	0.0205
					Quaking Grass	-0.003	0.0185
					Sunflower	-0.0418	0.5057
					Cos Lettuce	-0.0037	0.0255
					Chicory	-0.0045	0.0369
					Oxeye Daisy	-0.0027	0.0112
					Black Knapweed	-0.0063	0.0764
					Cornflower	-0.01	0.1154

## Sheet: Oxytetracycline_RL
Radicle measurements
Antibiotic:	Oxtetracycline hydrochloride
	Fabaceae species				Poaceae species						Asteracea species
Measurement N°, mm	French bean	Pea	White clover	Red clover	Oats (Conway)	Wheat (Claire)	Barley	Sheep's fescue	Red fescue	Quaking grass	Sunflower	Cos lettuce	Chicory	Oxeye daisy	Black knapweed	Cornflower
Average	0	16.5507	33.109	31.5764	14.5921	62.6543	72.0918	0	11.6789	0	16.993	43.3955	1.18176	6.9122	13.8131	75.9743
Minimum	0	7.48332	16.5149	6.21695	5.62326	25.4464	49.3179	0	1.57864	0	3.05984	5.41273	1.18176	2.6541	5.04556	34.1326
Maximum	0	26.3913	49.0154	63.0832	26.848	78.3067	89.8691	0	23.5502	0	51.6841	79.2899	1.18176	11.2242	22.5807	152.553
1	0	13.1701	33.2164	36.5567	11.0705	47.6664	71.7863	0	13.765	0	3.05984	57.9421	1.18176	2.6541	22.5807	111.814
2		12.987	39.1408	27.7474	5.62326	69.0243	65.2333		6.34778		7.99626	44.676		11.2242	5.04556	86.2567
3		12.0938	36.2225	39.7133	26.848	53.8671	81.1835		9.89971		33.921	57.1787		5.94996		152.553
4		18.1084	30.601	12.4986	14.8265	74.5927	49.3179		6.80056		22.4474	45.6333		7.82052		47.9671
5		9.14117	30.0045	34.6169		68.5497	65.6949		4.74558		3.16772	12.7355				61.5193
6		21.4688	16.5149	39.1259		70.8479	67.6041		12.3512		8.27224	57.2288				64.38
7		21.9081	27.7665	20.5373		50.2984	62.178		23.5502		6.70513	34.756				53.6095
8		7.48332	39.2977	53.3792		70.79	74.2809		14.3585		20.1226	27.8132				71.249
9		12.7024	34.7682	63.0832		60.3843	76.4853		4.42472		3.71925	47.8652				133.986
10		26.3913	34.4338	25.8751		32.5213	72.4577		10.9058		25.7562	44.4284				39.4552
11		25.5051	27.2713	50.1674		71.6073	63.537		7.13162		10.9812	46.4054				81.3922
12		17.6486	30.4577	17.4227		69.0831	61.4425		20.8072		19.01	79.2899				71.6034
13			47.2506	41.6377		61.3578	62.138		15.6309		33.2665	57.7983				34.1326
14			49.0154	37.951		72.6288	89.8691		8.84223		23.4906	37.2971				66.1574
15			40.1417	45.287		25.4464	67.9065		18.4222		7.56541	13.0228				87.5865
16			31.7619	16.961		74.7502	82.9984		9.72741		15.6516	18.9321				71.5803
17			25.3063	36.1669		51.9194	82.4223		14.4221		20.3892	61.1668				101.304
18			28.2897	31.3664		55.7188	69.2862		1.57864		17.0171	54.0391				114.484
19			33.8923	19.7295		73.2766	82.0097		22.3405		29.769	46.0451				42.8727
20			19.4019	6.21695		78.3067	63.4611		7.03661		6.31521	47.1225				83.376
21			30.3404	18.8594		68.7041	71.9772		12.1676		15.2763	55.3789				57.9116
22			33.3857	19.7804		74.9149	72.2373				12.1603	41.3788				54.0077
23			47.0112			68.9121	81.7317				51.6841	23.9624				97.8439
24			35.8589			65.7196	67.3974				9.04318	51.151				36.3412
25			20.0787			61.8972	76.5065				9.70406	5.41273
26			41.2003			42.0851	75.4521				25.3274	26.6345
27			41.3331			59.3553	84.5024					55.4198
28			23.0891			73.1007	73.7576					64.3582
29						71.5652	79.4297
30						60.7371	68.4677

## Sheet: Florfenicol_G
Seedling germination
Start date:	2024-06-06
Antibiotic:	Florfenicol
Actual concentration:	0.9960 mg/L
Seed Species	Seed ID	Quantity	Container weight, g	Container + seeds weight, g	Container + wet seeds weight, g	Container + dried seeds weight, after drying at 50 °C, g	mi (mg)	mfdry	Mass change following 7 days incubation at 18 °C	Average mass change following incubation	Mass change following drying at 50 °C	Average mass change following drying	Date of first seedling emergence	Total seeds germinated	Average radicle length, mm	Minimum radicle length, mm	Maximum radicle length, mm	Comments
			W1	W2	W3	W4	W2-W1	W4-W1	W5 = (W3 - W2)	W5 / Quantity	W6 = (W4 - W3)	W6 / Quantity	(dd/mm/yyyy)
Fabaceae	French Bean	30	2.2294	6.7695	13.0461	5.8234	4.5401	3.594	6.2766	0.20922	-7.2227	-0.240757	2024-06-10	1	0	0	0
	Pea	30	2.2688	7.9256	16.9787	7.0264	5.6568	4.7576	9.0531	0.30177	-9.9523	-0.331743	2024-06-10	15	0	0	0
	White Clover	30	0.4085	0.43	0.6654	0.4237	0.0215	0.0152	0.2354	0.00784667	-0.2417	-0.00805667	2024-06-07	20	0	0	0
	Red Clover	30	0.4042	0.4533	0.7395	0.4447	0.0491	0.0405	0.2862	0.00954	-0.2948	-0.00982667	2024-06-07	19	0	0	0
Poaceae	Oats (Conway)	30	2.2723	3.7815	8.2019	3.6139	1.5092	1.3416	4.4204	0.147347	-4.588	-0.152933	2024-06-10	20	0	0	0
	Wheat (Claire)	30	2.2775	3.1996	6.7249	3.0042	0.9221	0.7267	3.5253	0.11751	-3.7207	-0.124023	2024-06-07	29	0	0	0
	Barley	30	2.2584	3.1767	9.0311	2.9477	0.9183	0.6893	5.8544	0.195147	-6.0834	-0.20278	2024-06-07	28	0	0	0
	Sheeps Fescue	30	0.4052	0.4317	0.4502	0.4296	0.0265	0.0244	0.0185	0.000616667	-0.0206	-0.000686667	2024-06-13	1	0	0	0
	Red Fescue	30	0.4061	0.4292	0.5121	0.4259	0.0231	0.0198	0.0829	0.00276333	-0.0862	-0.00287333	2024-06-10	25	0	0	0
	Quaking Grass	30	0.4042	0.4233	0.4911	0.4216	0.0191	0.0174	0.0678	0.00226	-0.0695	-0.00231667	2024-06-13	1	0	0	0
Asteracea	Sunflower	30	2.278	2.8468	4.444	2.8111	0.5688	0.5331	1.5972	0.05324	-1.6329	-0.05443	2024-06-10	23	0	0	0
	Cos Lettuce	30	0.406	0.4355	0.9956	0.4316	0.0295	0.0256	0.5601	0.01867	-0.564	-0.0188	2024-06-07	27	0	0	0
	Chicory	30	0.4032	0.4451	0.476	0.4419	0.0419	0.0387	0.0309	0.00103	-0.0341	-0.00113667	2024-06-11	2	0	0	0
	Oxeye Daisy	30	0.4051	0.4192	0.4572	0.418	0.0141	0.0129	0.038	0.00126667	-0.0392	-0.00130667	2024-06-12	2	0	0	0
	Black Knapweed	30	0.403	0.4861	0.5734	0.4806	0.0831	0.0776	0.0873	0.00291	-0.0928	-0.00309333	2024-06-11	2	0	0	0
	Cornflower	30	2.2394	2.3681	4.021	2.3621	0.1287	0.1227	1.6529	0.0550967	-1.6589	-0.0552967	2024-06-07	28	0	0	0
						Δm (mf-mi)	mf
					French Bean	-0.9461	3.594
					Pea	-0.8992	4.7576
					White Clover	-0.0063	0.0152
					Red Clover	-0.0086	0.0405
					Oats (Conway)	-0.1676	1.3416
					Wheat (Claire)	-0.1954	0.7267
					Barley	-0.229	0.6893
					Sheeps Fescue	-0.0021	0.0244
					Red Fescue	-0.0033	0.0198
					Quaking Grass	-0.0017	0.0174
					Sunflower	-0.0357	0.5331
					Cos Lettuce	-0.0039	0.0256
					Chicory	-0.0032	0.0387
					Oxeye Daisy	-0.0012	0.0129
					Black Knapweed	-0.0055	0.0776
					Cornflower	-0.006	0.1227

## Sheet: Florfenicol_RL
Radicle measurements
Antibiotic:	Florfenicol
	Fabaceae species				Poaceae species						Asteracea species
Measurement N°, mm	French bean	Pea	White clover	Red clover	Oats (Conway)	Wheat (Claire)	Barley	Sheep's fescue	Red fescue	Quaking grass	Sunflower	Cos lettuce	Chicory	Oxeye daisy	Black knapweed	Cornflower
Average	30.7042	22.472	38.1711	45.6149	48.341	61.2857	79.1314	8.35146	12.9932	0.662654	22.5903	56.9352	5.12549	6.57337	12.0364	95.8549
Minimum	30.7042	2.78481	10.3945	9.64527	4.82189	14.5191	52.071	8.35146	4.74966	0.662654	4.35167	9.60914	2.89284	4.55344	7.69348	20.9741
Maximum	30.7042	40.6306	56.9343	67.4577	72.4198	82.2058	107.116	8.35146	45.1035	0.662654	66.9885	79.6752	7.35815	8.5933	16.3793	158.503
1	30.7042	6.39874	31.2282	50.7462	67.652	82.2058	71.7395	8.35146	20.7373	0.662654	4.35167	67.8195	2.89284	8.5933	16.3793	112.916
2		10.5812	41.1774	51.6437	62.5663	67.1961	85.3238		13.0319		36.8797	9.60914	7.35815	4.55344	7.69348	127.383
3		24.1762	49.627	47.4447	43.1502	28.3819	75.1067		15.3919		9.71177	61.709				87.4156
4		11.113	10.3945	63.6342	4.82189	72.5183	78.8245		6.98494		66.9885	61.3869				113.931
5		8.69611	36.4732	43.5747	61.4747	73.0263	93.5362		17.7686		13.8988	60.3893				114.519
6		37.8133	41.0704	59.8663	60.4762	56.249	87.608		6.24683		30.006	66.2058				156.246
7		33.6636	35.2654	56.7152	50.6469	77.6752	88.4498		12.4998		25.5521	69.2062				104.577
8		25.5354	39.2416	25.3296	72.4198	54.5329	95.6469		7.87137		24.6295	72.6835				119.41
9		25.9628	31.8386	57.7655	27.2296	39.5144	78.3062		16.2696		36.4696	62.6598				93.1981
10		2.78481	40.6256	54.4031	66.9472	59.2876	62.7244		45.1035		17.1799	76.2077				114.415
11		11.7862	25.235	59.5215	53.6094	74.895	76.2642		8.35907		10.5194	60.6472				20.9741
12		40.3192	56.9343	15.1277	54.4631	54.5733	79.6668		7.41327		26.9695	53.1758				127.466
13		18.9353	35.8145	37.5378	17.9415	69.3806	85.1751		12.2674		19.9821	61.5111				105.048
14		38.6831	39.9868	22.1318	31.3568	67.783	71.7039		13.2589		10.8528	60.698				43.6519
15		40.6306	33.2819	58.1144	65.8367	55.5849	79.0021		14.618		30.4729	78.7321				76.8905
16			44.8712	59.3583	37.1388	40.4487	87.6789		18.315		10.7651	35.9825				101.242
17			53.1073	9.64527	36.6333	70.5342	107.116		8.00881		7.92359	15.1278				85.9558
18			47.4635	26.6662	21.8081	34.6095	75.2943		10.6727		26.5987	79.6752				62.2603
19			34.4946	67.4577	59.5988	66.1427	90.6032		4.74966		9.72429	54.9414				139.262
20			35.2903		71.049	73.398	74.7203		11.4663		19.7371	55.468				67.0992
21						14.5191	52.071		15.7422		38.4107	76.7816				97.8759
22						61.3047	52.7742		8.5113		10.4711	16.1547				58.9547
23						65.9236	78.4187		7.38842		31.4818	69.2786				95.2067
24						74.0197	78.3444		7.10368			58.8463				62.3309
25						79.4651	82.3754		15.0485			78.7537				74.978
26						60.37	65.0438					26.4538				158.503
27						61.8555	73.543					47.147				72.6785
28						70.3929	88.6168									89.5499
29						71.496
30

[truncated: 12 more sheets: Chloramphenicol_G, Chloramphenicol_RL, Lincomyscin_G, Lincomyscin_RL, Sulfamethazine_G, Sulfamethazine_RL, Trimethoprim_G, Trimethoprim_RL, Azithromycin_G, Azithromycin_RL, Control_G, Control_RL]
